# Supplementary material for: Poly(amide-imide) materials for transparent and flexible displays
Source: PubMed Central journal article supplement — Sci Adv. 2018 Oct 26;4(10):eaau1956. doi: 10.1126/sciadv.aau1956 (PMC6203221; doi:10.1126/sciadv.aau1956), 2018-10-26
Supplement: aau1956_SM.pdf [file aau1956_SM.pdf]

## Supplementary Materials for

### Poly(amide-imide) materials for transparent and flexible displays

Sun Dal Kim, Byungyong Lee, Taejoon Byun, Im Sik Chung, Jongmin Park, Isaac Shin, Nam Young Ahn, Myungeun Seo, Yunho Lee, Yeonjoon Kim, Woo Youn Kim, Hyukyun Kwon, Hanul Moon, Seunghyup Yoo, Sang Youl Kim\*

\*Corresponding author. Email: kimsy@kaist.ac.kr

Published 26 October 2018, *Sci. Adv.* **4**, eaau1956 (2018)

DOI: 10.1126/sciadv.aau1956

#### This PDF file includes:

- Fig. S1. Synthetic route to *u*DA.
- Fig. S2. <sup>1</sup>H NMR spectra of the nitro intermediate **2** and *u*DA.
- Fig. S3. <sup>13</sup>C NMR spectra of the nitro intermediate **2** and *u*DA.
- Fig. S4. FTIR spectra of the nitro intermediate **2** and *u*DA.
- Fig. S5. Synthetic route to diacids.
- Fig. S6. <sup>1</sup>H NMR spectra of the diacids *u*DAC and *s*DAC.
- Fig. S7. <sup>13</sup>C NMR spectra of the diacids *u*DAC and *s*DAC.
- Fig. S8. FTIR spectrum of *u*DAC.
- Fig. S9. <sup>1</sup>H-NMR spectra of PAIs.
- Fig. S10. Photos of PAI films.
- Fig. S11. UV-vis spectra of PAIs.
- Fig. S12. TGA data of PAIs.
- Fig. S13. DSC data of representative PAIs.
- Fig. S14. DMA data of PAIs.
- Fig. S15. TMA data of PAIs.
- Fig. S16. 2D GIWAXS data of PAIs.
- Fig. S17. 1D deconvoluted plot of the GIWAXS data in out-of-plane direction.
- Fig. S18. 1D deconvoluted plot of the GIWAXS data in in-plane direction.
- Fig. S19. A plot of CTE and  $\pi$ - $\pi$  stacking distance versus  $\beta$ -relaxation temperature determined by the DMA.
- Fig. S20. Synthetic route to model compound amide-*u*DA and imide-*u*DA.
- Fig. S21. <sup>1</sup>H NMR spectra of model compounds amide-*u*DA and imide-*u*DA.
- Fig. S22. <sup>13</sup>C NMR spectra of model compound amide-*u*DA and imide-*u*DA.
- Fig. S23. FTIR spectra of model compound amide-*u*DA and imide-*u*DA.
- Fig. S24. Chemical and crystal structures of model compound amide-*u*DA and imide-*u*DA.
- Fig. S25. Ten most stable structures of PAI(*s-s*).
- Fig. S26. Ten most stable structures of PAI(*s-u*).

Fig. S27. Ten most stable structures of PAI(*u-s*).

Fig. S28. Ten most stable structures of PAI(*u-u*).

Fig. S29. Transfer characteristics of the IGZO TFTs under study.

Table S1. Solubility of PAIs.

Table S2. Birefringence of PAIs.

Table S3. Transition temperatures of PAIs identified by the DMA.

Table S4. Summary of the GIWAXS peak positions.

Tables S5. Crystal data and structure refinement for amide-*u*DA.

Tables S6. Crystal data and structure refinement for imide-*u*DA.

Table S7. Bonding energies and geometric features of the 10 most stable dimeric structures for each of PAI(*s-s*), PAI(*s-u*), PAI(*u-s*), and PAI(*u-u*).

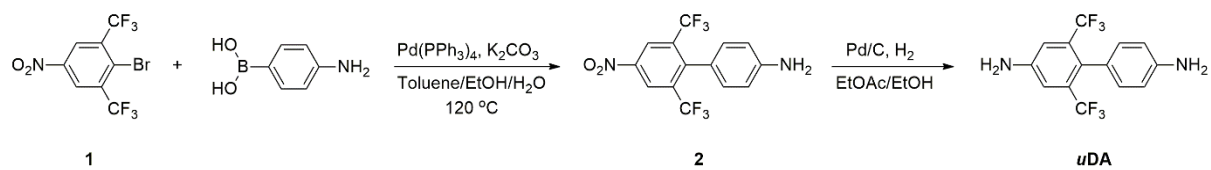

**Fig. S1. Synthetic route to *uDA*.**

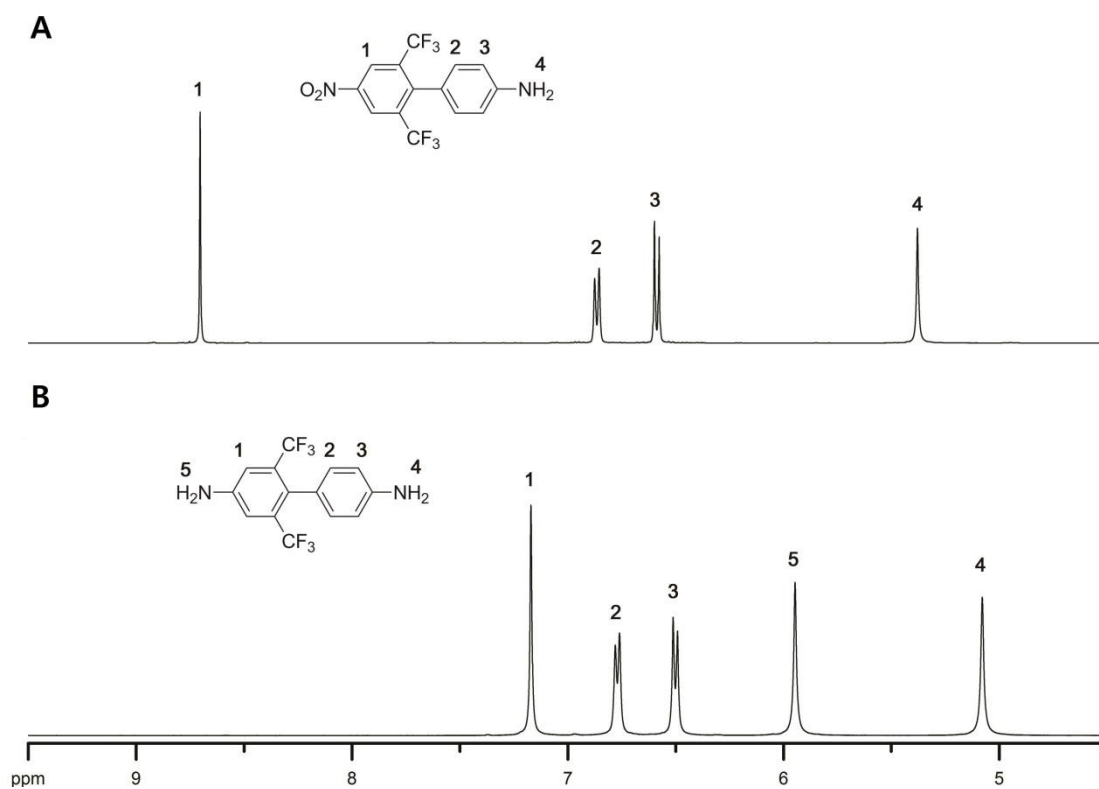

**Fig. S2.  $^1\text{H}$  NMR spectra of (A) the nitro intermediate **2** and (B) *uDA*.**

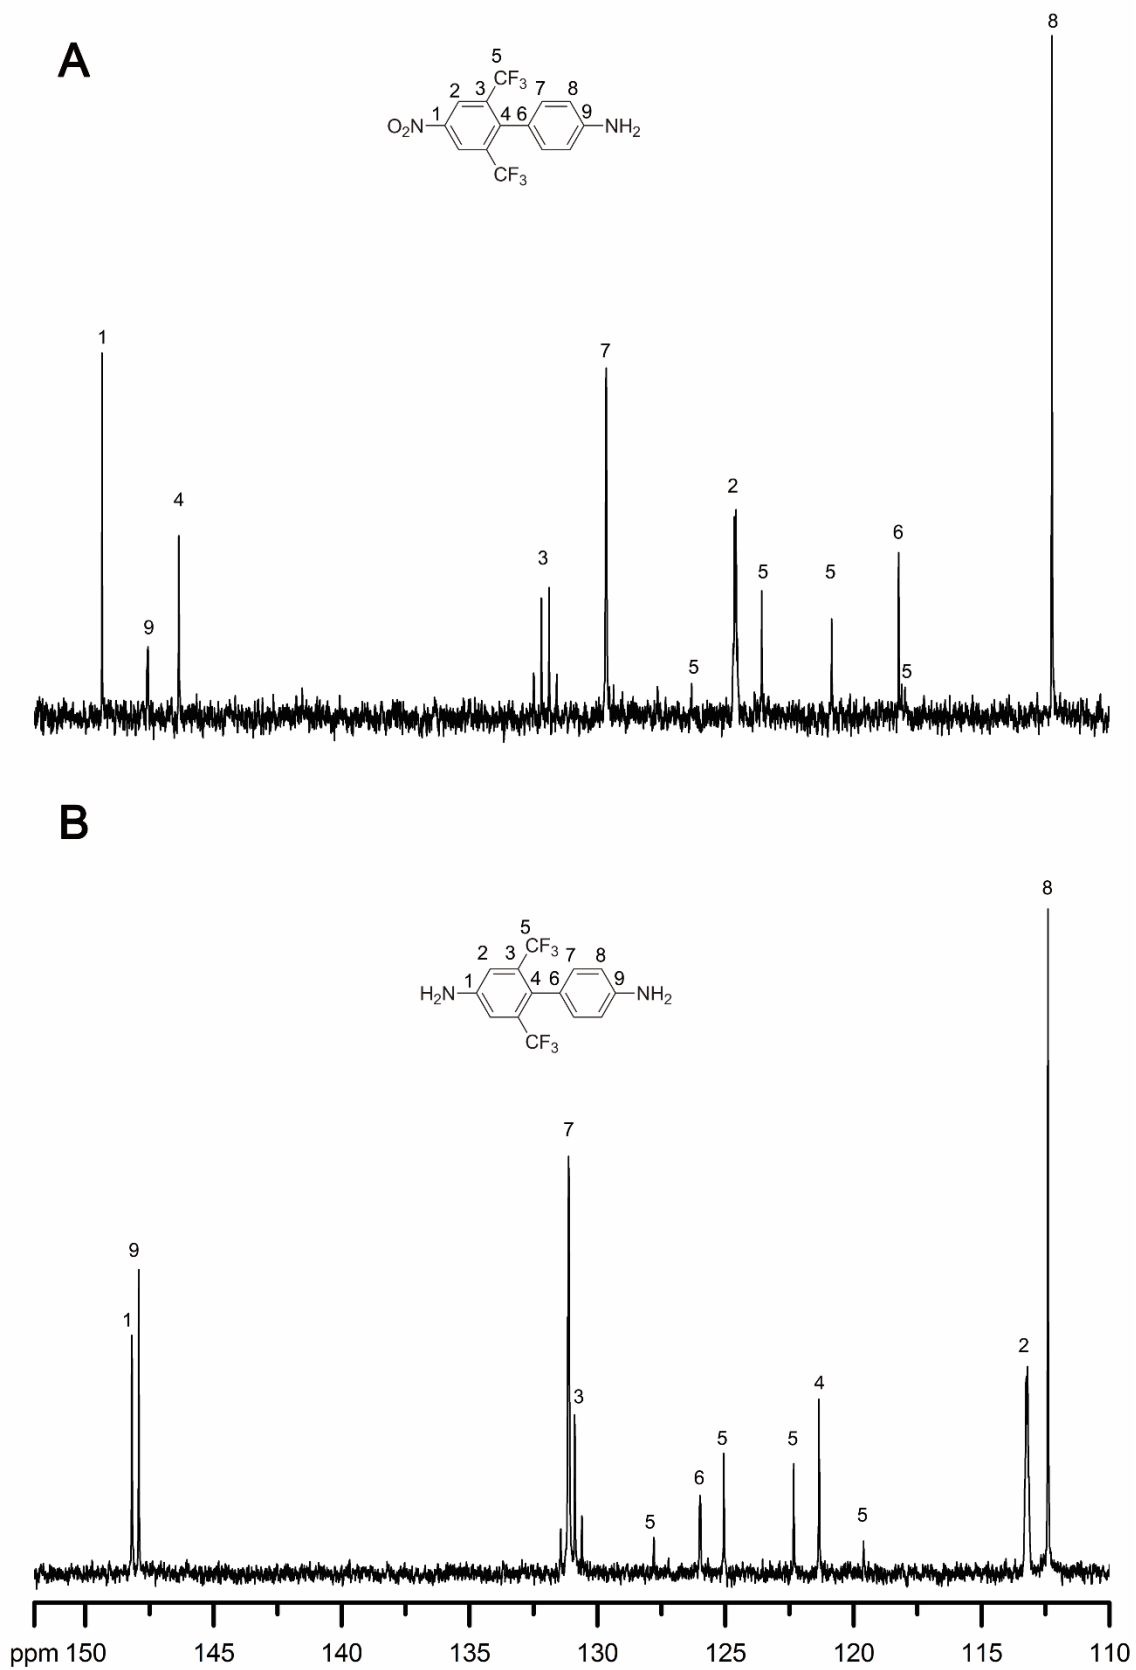

**Fig. S3.**  $^{13}\text{C}$  NMR spectra of (A) the nitro intermediate **2** and (B) *uDA*.

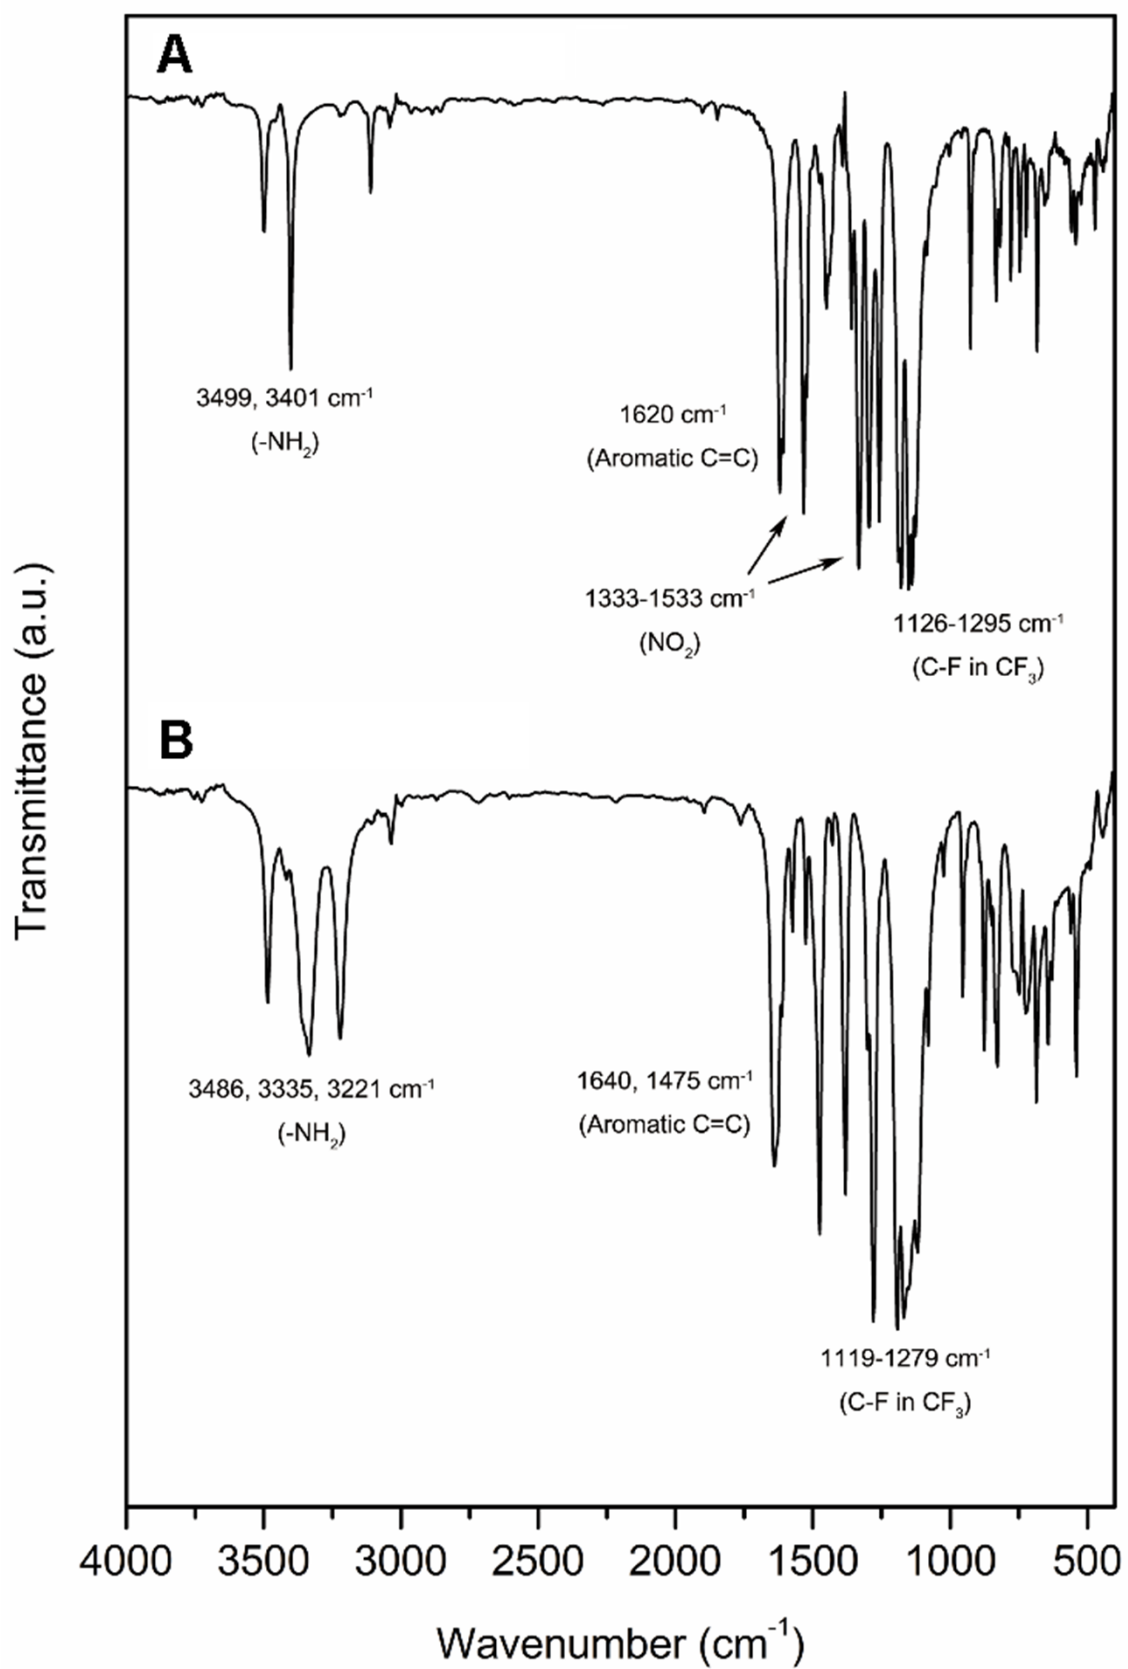

Fig. S4. FTIR spectra of (A) the nitro intermediate 2 and (B) *u*DA.

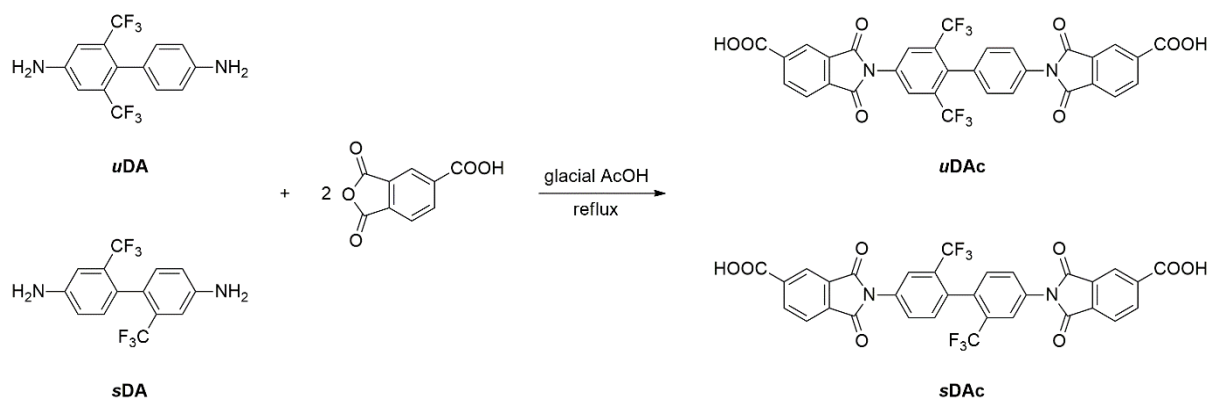

**Fig. S5. Synthetic route to diacids.**

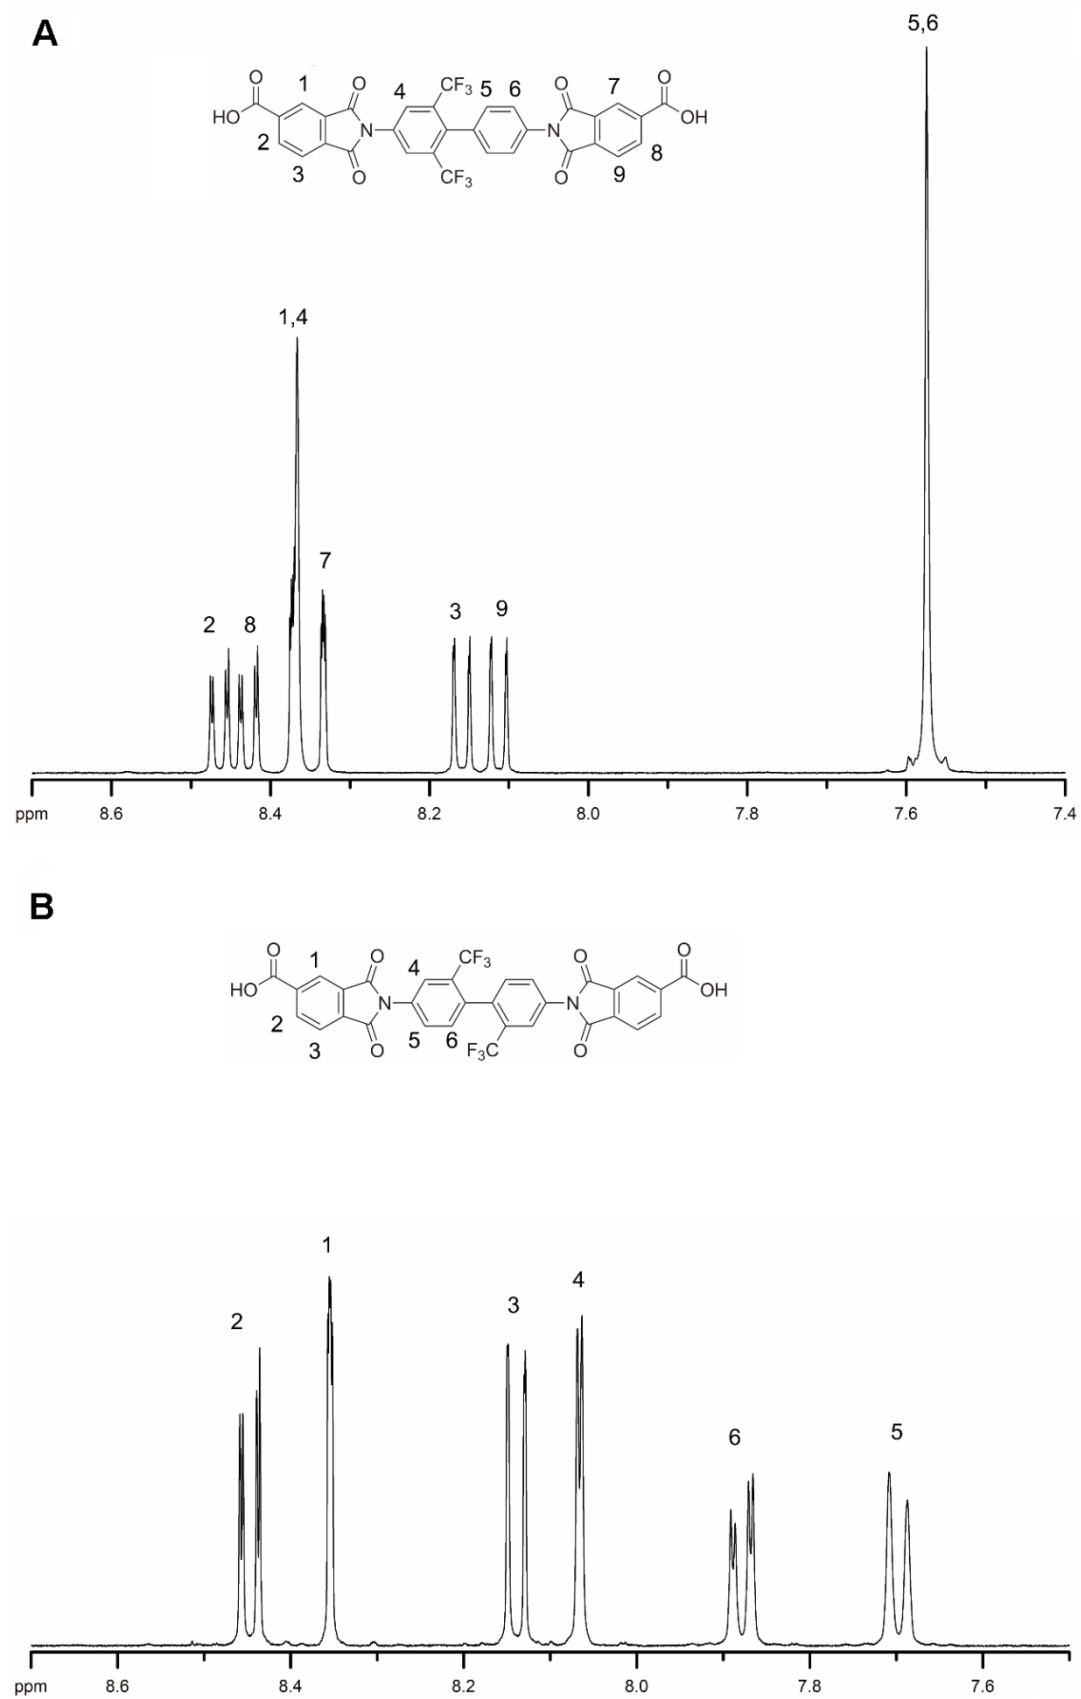

**Fig. S6.  $^1\text{H}$  NMR spectra of the diacids (A: *u*Dac, B: *s*Dac).**

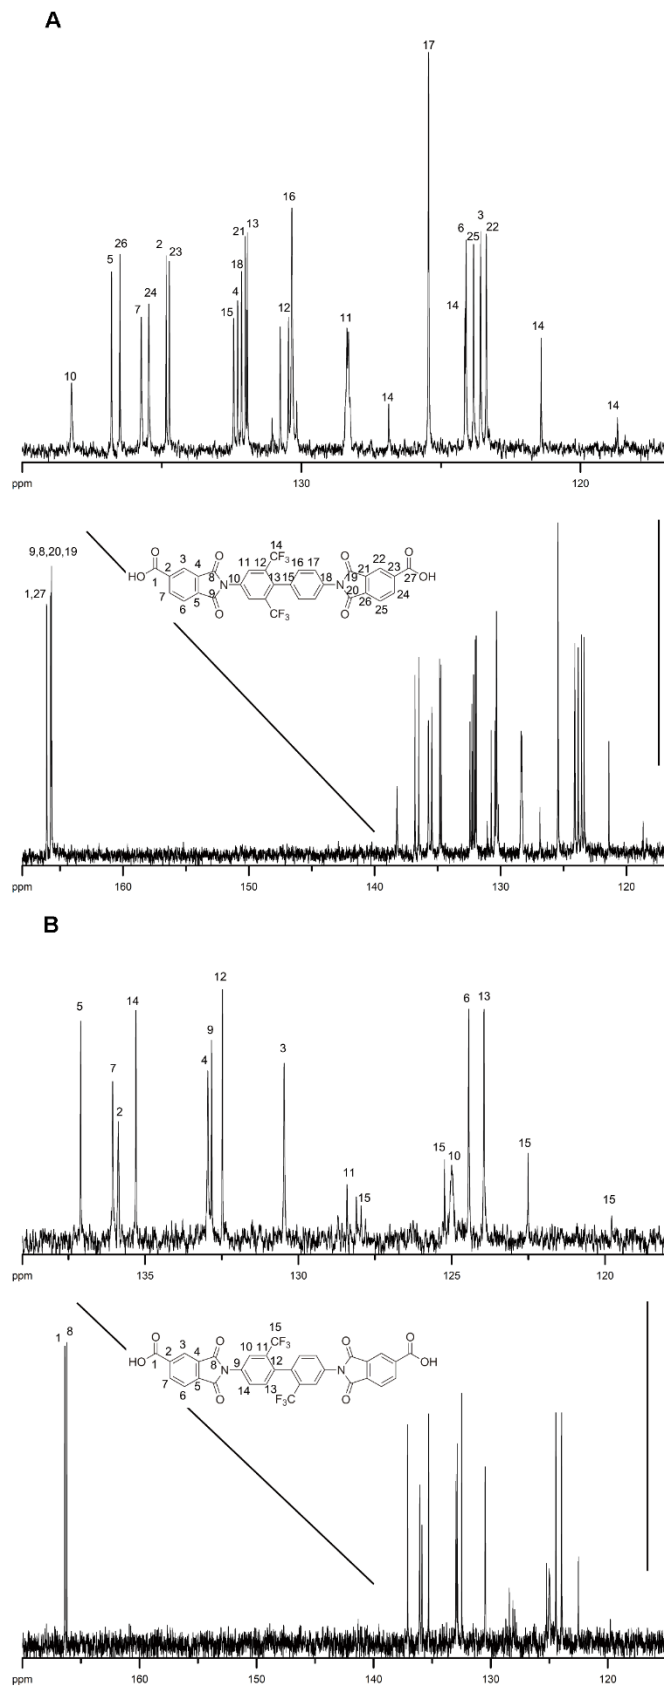

**Fig. S7.**  $^{13}\text{C}$  NMR spectra of the diacids (A: *u*Dac, B: *s*Dac).



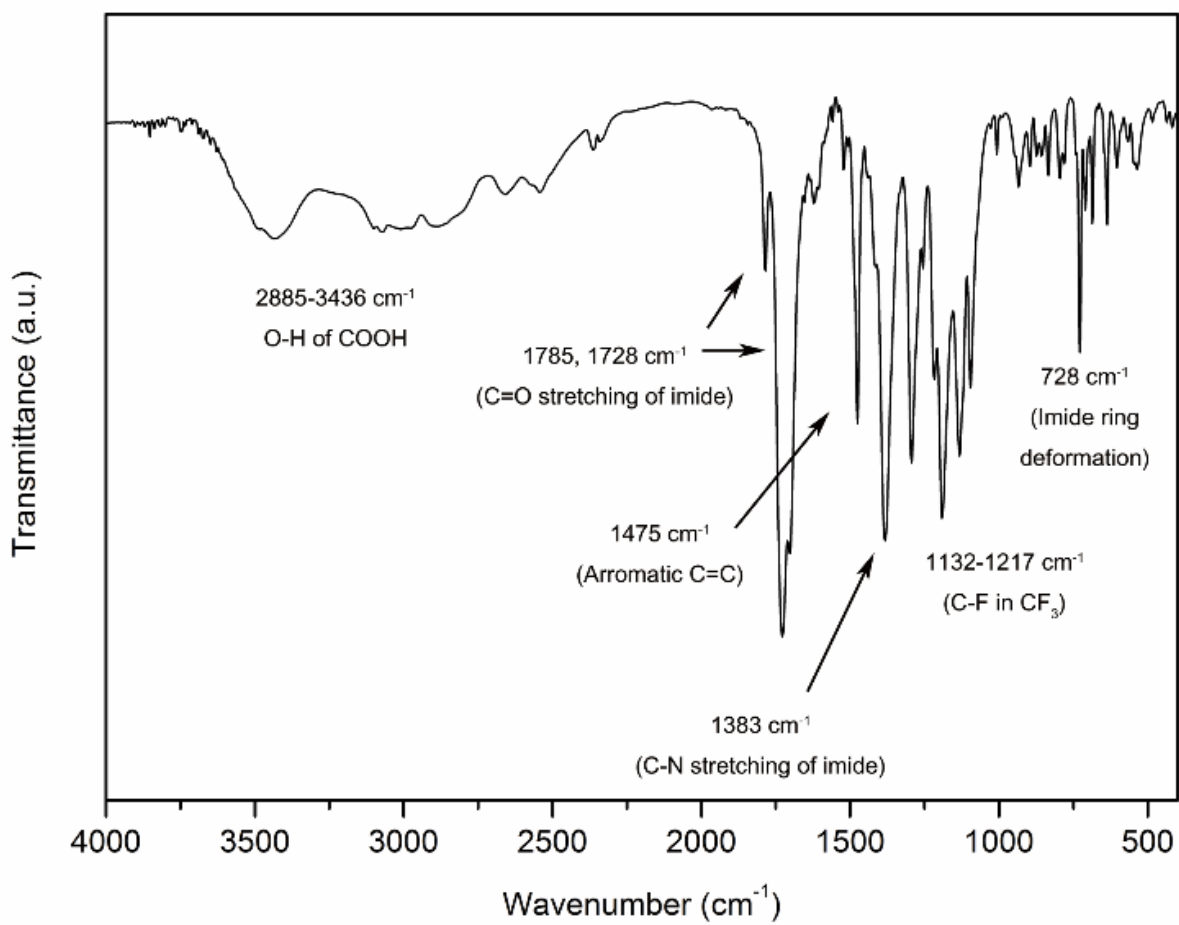

**Fig. S8. FTIR spectrum of *uDAc*.**

**PAI(u-u)**

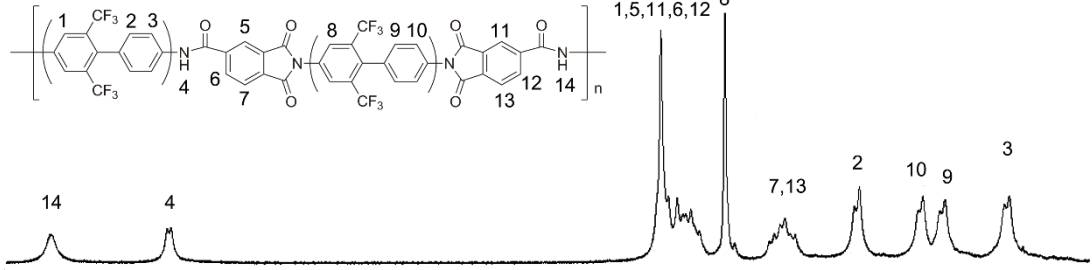

**PAI(s-s)**

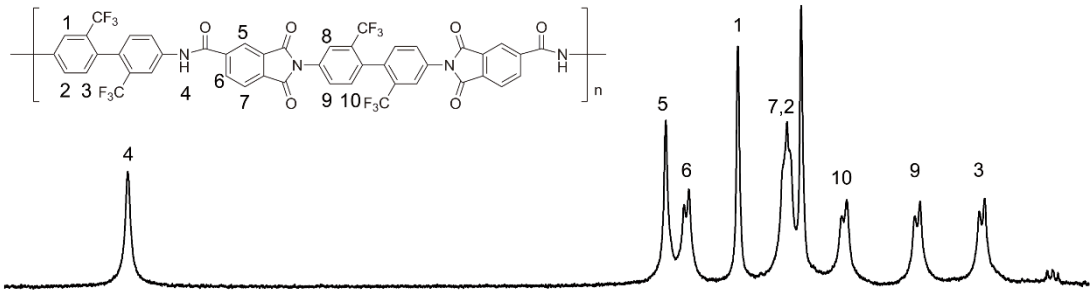

**PAI(s-u)**

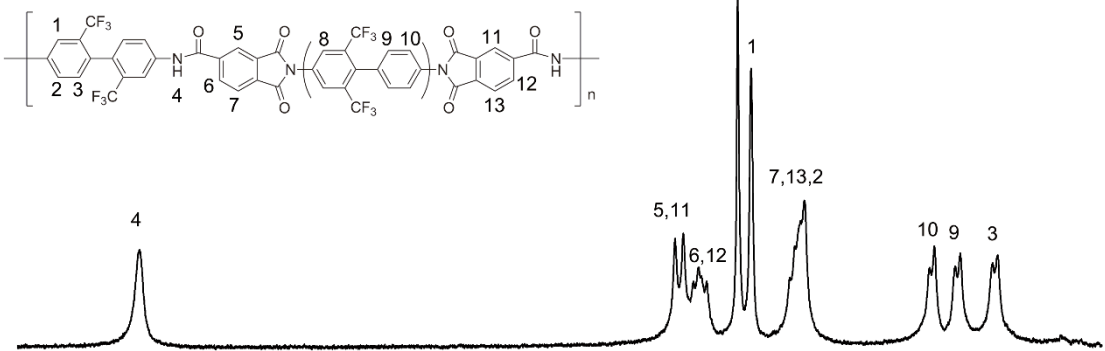

**PAI(u-s)**

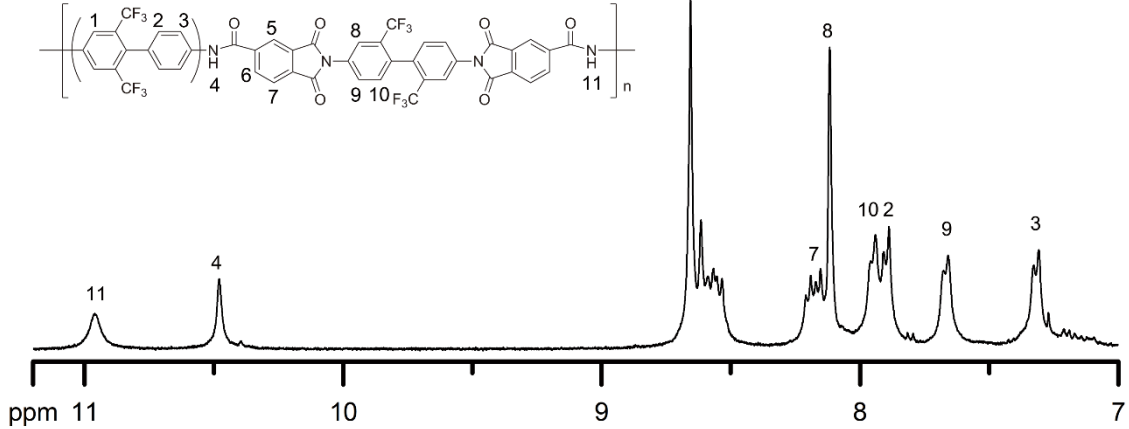

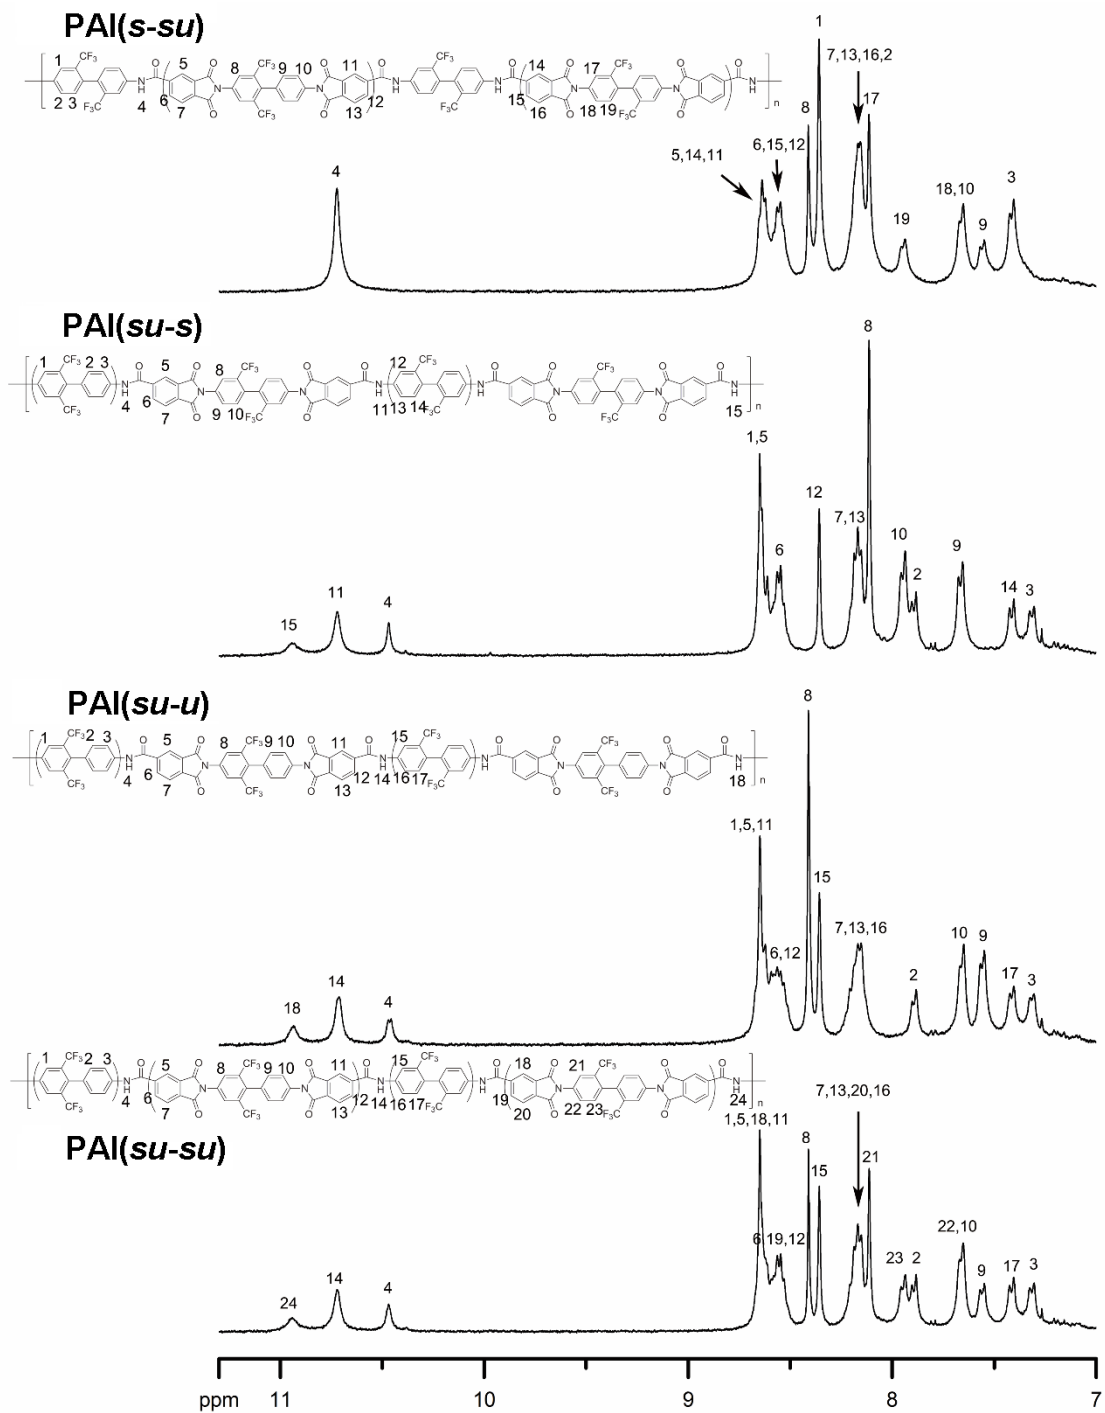

**Fig. S9.**  $^1\text{H-NMR}$  spectra of PAIs.

**Table S1. Solubility of PAIs.**

| Solvents         | PAI<br>( <i>u-u</i> ) | PAI<br>( <i>s-s</i> ) | PAI<br>( <i>s-u</i> ) | PAI<br>( <i>u-s</i> ) | PAI<br>( <i>s-su</i> ) | PAI<br>( <i>su-s</i> ) | PAI<br>( <i>su-u</i> ) | PAI<br>( <i>su-su</i> ) |
|------------------|-----------------------|-----------------------|-----------------------|-----------------------|------------------------|------------------------|------------------------|-------------------------|
| THF              | ++                    | ++                    | ++                    | ++                    | ++                     | ++                     | ++                     | ++                      |
| DMF              | ++                    | ++                    | ++                    | ++                    | ++                     | ++                     | ++                     | ++                      |
| DMSO             | ++                    | ++                    | ++                    | ++                    | ++                     | ++                     | ++                     | ++                      |
| NMP              | ++                    | ++                    | ++                    | ++                    | ++                     | ++                     | ++                     | ++                      |
| DMAc             | ++                    | ++                    | ++                    | ++                    | ++                     | ++                     | ++                     | ++                      |
| <i>m</i> -Cresol | ++                    | ++                    | ++                    | ++                    | ++                     | ++                     | ++                     | ++                      |
| Ethyl acetate    | -                     | -                     | -                     | -                     | -                      | -                      | -                      | -                       |
| Acetone          | -                     | -                     | -                     | -                     | -                      | -                      | -                      | -                       |
| Anisole          | -                     | -                     | -                     | -                     | -                      | -                      | -                      | -                       |
| Chloroform       | -                     | -                     | -                     | -                     | -                      | -                      | -                      | -                       |
| ODCB             | -                     | -                     | -                     | -                     | -                      | -                      | -                      | -                       |
| Acetonitrile     | -                     | -                     | -                     | -                     | -                      | -                      | -                      | -                       |
| Toluene          | -                     | -                     | -                     | -                     | -                      | -                      | -                      | -                       |
| Diethyl ether    | -                     | -                     | -                     | -                     | -                      | -                      | -                      | -                       |
| <i>n</i> -hexane | -                     | -                     | -                     | -                     | -                      | -                      | -                      | -                       |
| methanol         | -                     | -                     | -                     | -                     | -                      | -                      | -                      | -                       |

<sup>a</sup>Solubility: ++, soluble at room temperature; -, insoluble. Abbreviations: THF, tetrahydrofuran; DMF, *N,N*-dimethylformamide; DMSO, dimethyl sulfoxide; NMP, *N*-methylpyrrolidone; DMAc, *N,N*-dimethylacetamide; ODCB, 1,2-dichlorobenzene.

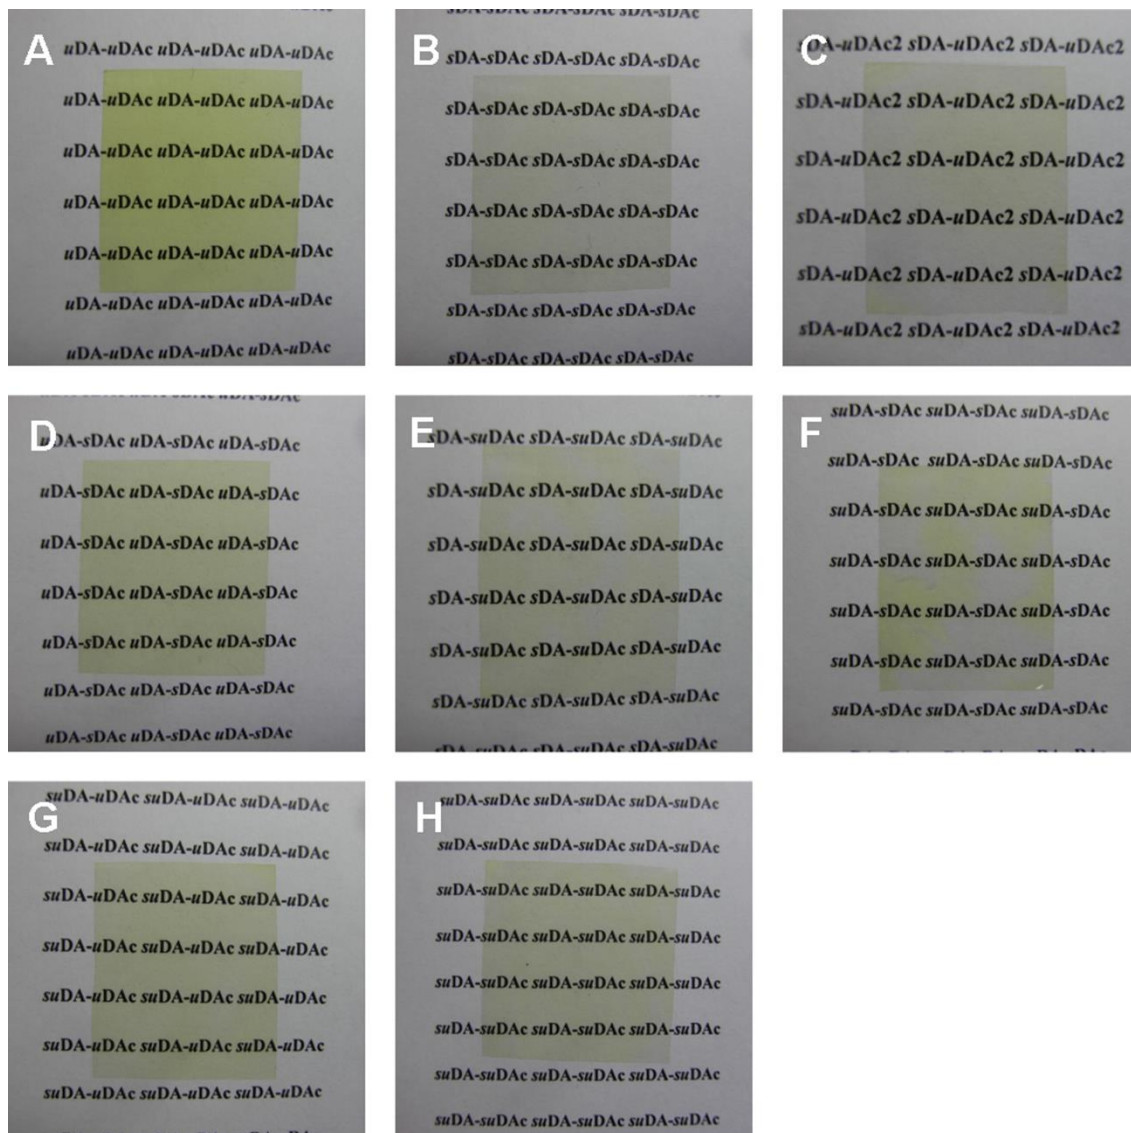

**Fig. S10. Photos of PAIs films. (A) PAI(*u-u*), (B) PAI(*s-s*), (C) PAI(*s-u*), (D) PAI(*u-s*), (E) PAI(*s-su*), (F) PAI(*su-s*), (G) PAI(*su-u*), (H) PAI(*su-su*).**

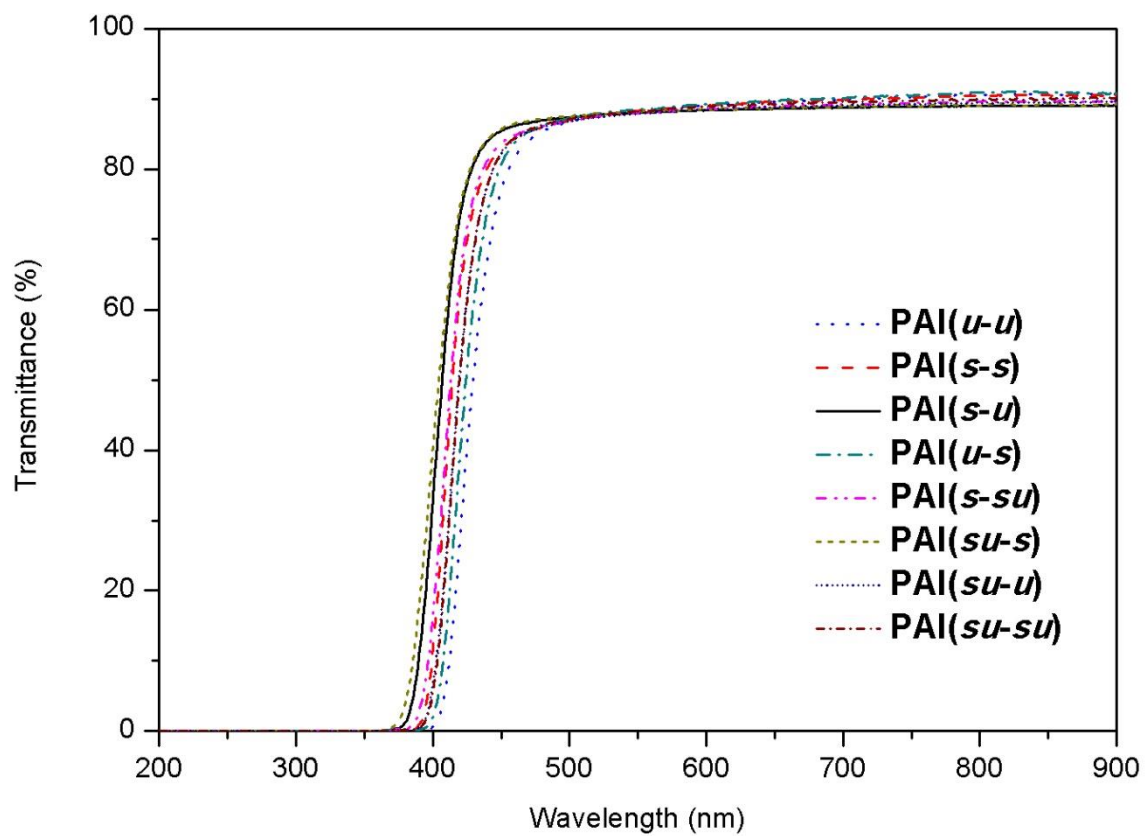

**Fig. S11.** UV-Visible spectra of PAIs.

**Table S2. Birefringence of PAIs.**

| $\lambda$ (nm) | Polymer code      | $n_{TE}^a$ | $n_{TM}^b$ | $n_{av}^c$ | $\Delta n^d$ | $\epsilon^e$ | $d(\mu m)^f$ |
|----------------|-------------------|------------|------------|------------|--------------|--------------|--------------|
| 633            | <b>PAI(u-u)</b>   | 1.638      | 1.517      | 1.598      | 0.121        | 2.81         | 14.8         |
|                | <b>PAI(s-s)</b>   | 1.648      | 1.513      | 1.603      | 0.135        | 2.83         | 6.5          |
|                | <b>PAI(s-u)</b>   | 1.645      | 1.506      | 1.599      | 0.139        | 2.81         | 13.7         |
|                | <b>PAI(u-s)</b>   | 1.641      | 1.516      | 1.599      | 0.125        | 2.81         | 3.0          |
|                | <b>PAI(s-su)</b>  | 1.647      | 1.510      | 1.601      | 0.137        | 2.82         | 8.8          |
|                | <b>PAI(su-s)</b>  | 1.644      | 1.518      | 1.602      | 0.126        | 2.82         | 3.2          |
|                | <b>PAI(su-u)</b>  | 1.641      | 1.508      | 1.597      | 0.133        | 2.81         | 7.1          |
|                | <b>PAI(su-su)</b> | 1.642      | 1.514      | 1.599      | 0.128        | 2.81         | 8.7          |
| 1310           | <b>PAI(u-u)</b>   | 1.604      | 1.498      | 1.569      | 0.106        | 2.71         | 14.7         |
|                | <b>PAI(s-s)</b>   | 1.615      | 1.495      | 1.575      | 0.120        | 2.73         | 6.5          |
|                | <b>PAI(s-u)</b>   | 1.612      | 1.489      | 1.571      | 0.123        | 2.71         | 13.6         |
|                | <b>PAI(u-s)</b>   | 1.608      | 1.497      | 1.571      | 0.111        | 2.71         | 3.1          |
|                | <b>PAI(s-su)</b>  | 1.610      | 1.491      | 1.570      | 0.119        | 2.71         | 8.5          |
|                | <b>PAI(su-s)</b>  | 1.610      | 1.499      | 1.573      | 0.111        | 2.72         | 3.3          |
|                | <b>PAI(su-u)</b>  | 1.606      | 1.492      | 1.568      | 0.114        | 2.70         | 7.3          |
|                | <b>PAI(su-su)</b> | 1.607      | 1.494      | 1.569      | 0.113        | 2.71         | 9.4          |

<sup>a</sup> $n_{TE}$ : the in-plane refractive index. <sup>b</sup> $n_{TM}$ : the out-of-plane refractive index. <sup>c</sup> $n_{av}$ : the average refractive index ( $n_{av} = (2n_{TE} + n_{TM})/3$ ). <sup>d</sup> $\Delta n$ : birefringence ( $n_{TE} - n_{TM}$ ). <sup>e</sup>Dielectric constant estimated from the refractive index:  $\epsilon \approx 1.10n_{av}^2$  <sup>f</sup>Film thickness for the refractive index measured.

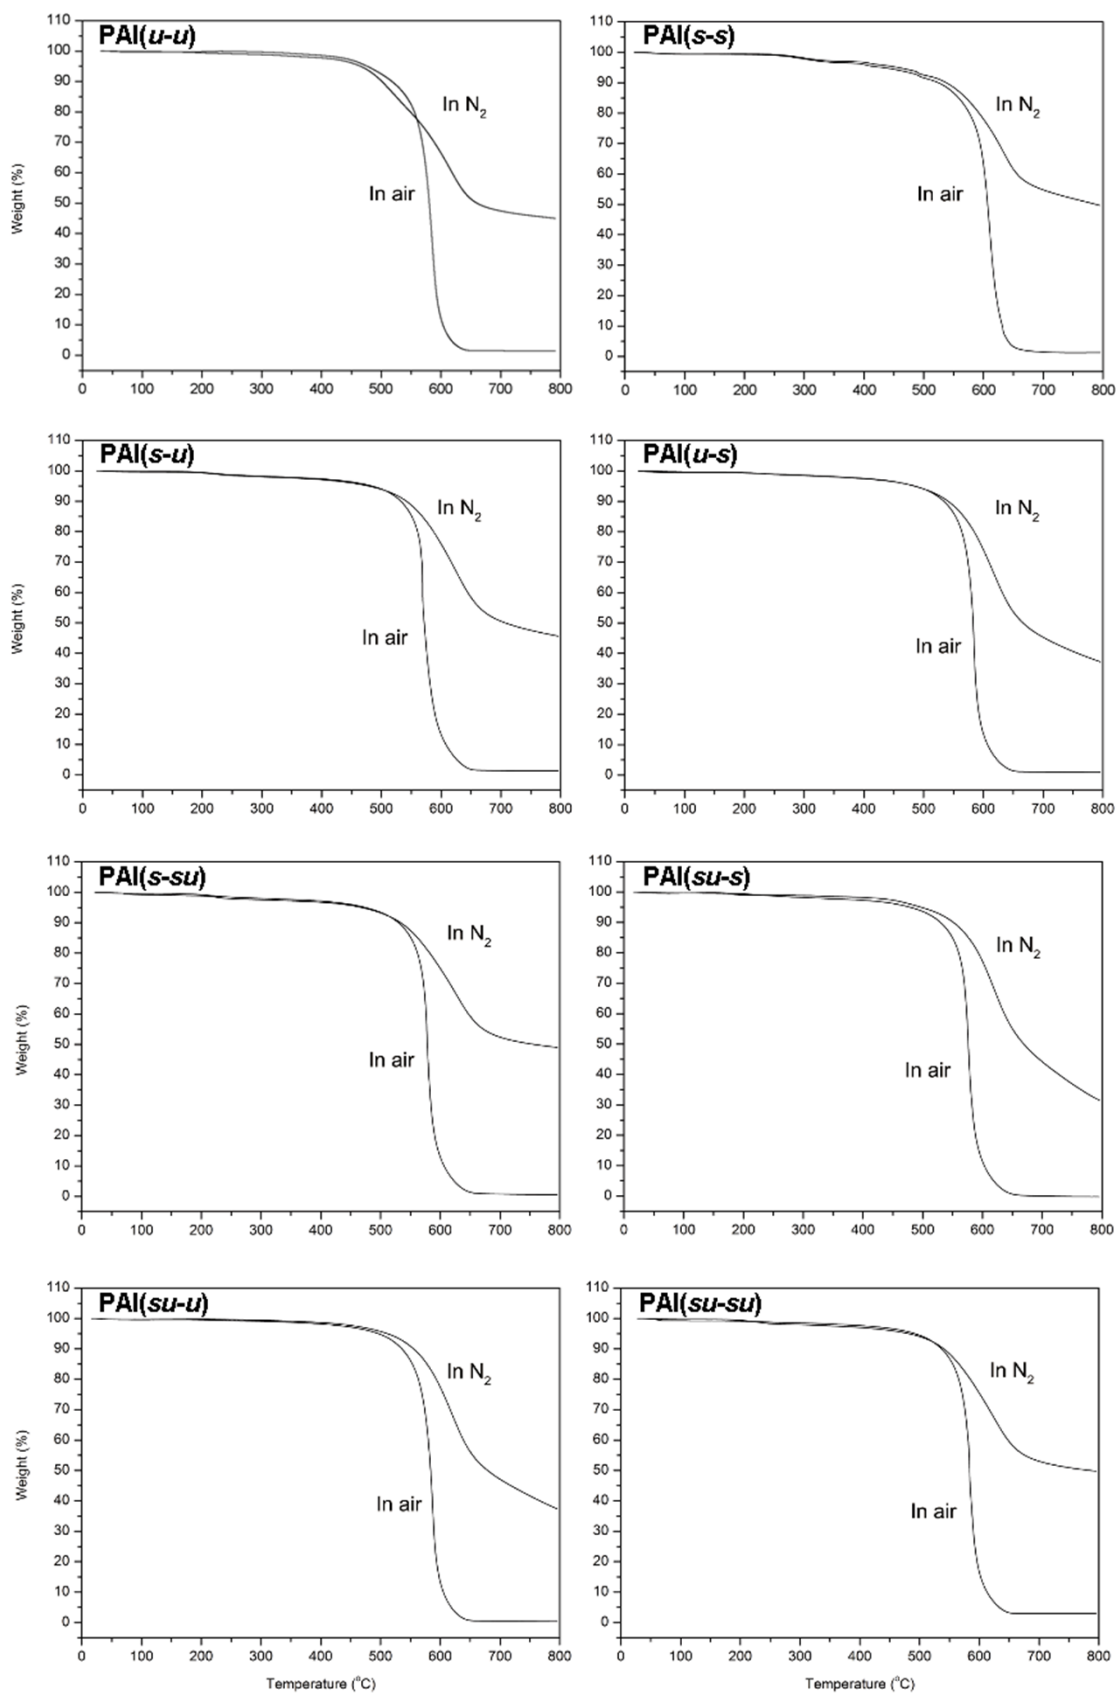

**Fig. S12.** TGA data of PAIs.



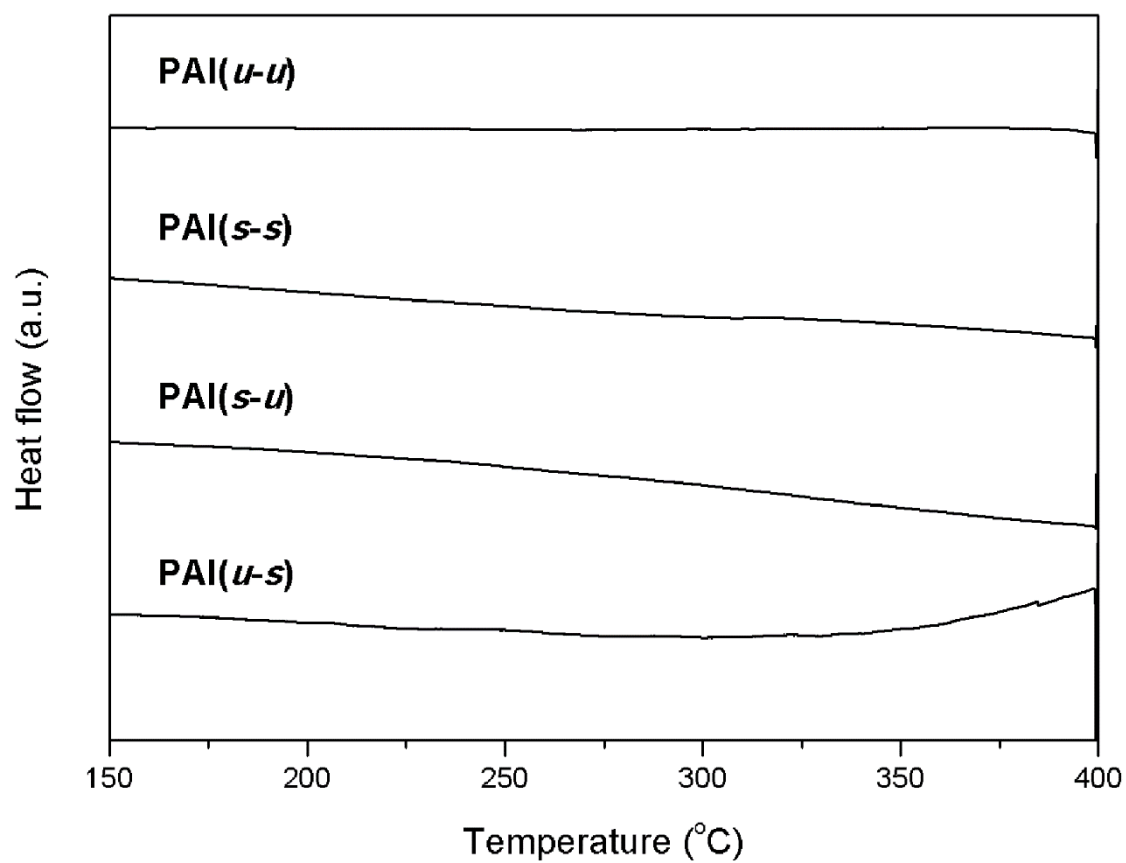

Fig. S13. DSC data of representative PAIs.

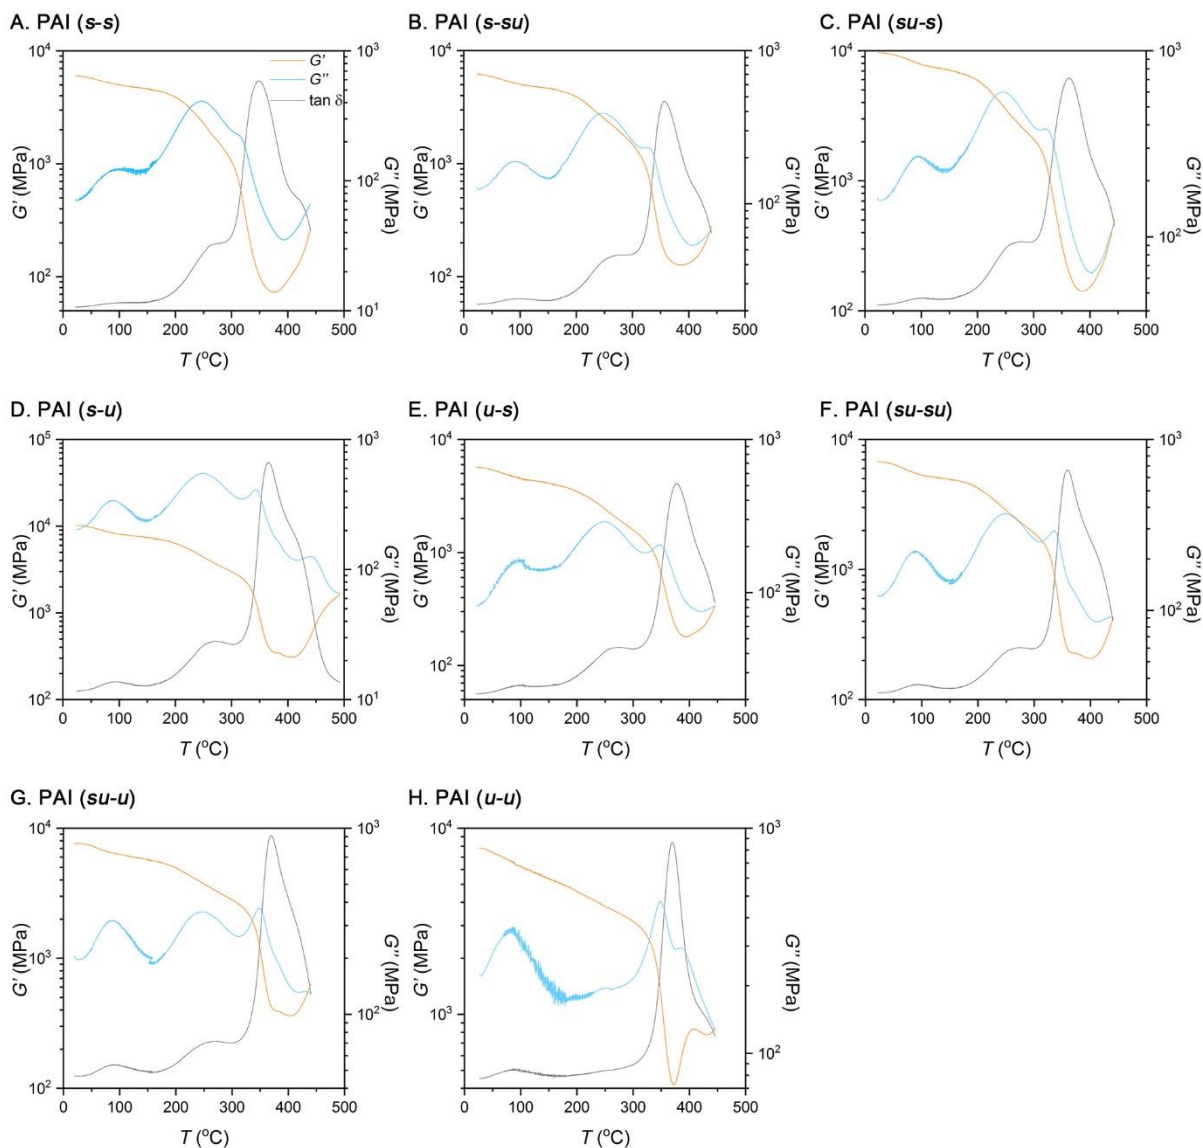

**Fig. S14. DMA data of PAIs.**

**Table S3. Transition temperatures of PAIs identified by the DMA.**

| Entry              | $T_{\alpha}$ (°C) | $T_{\beta}$ (°C) | $T_{\gamma}$ (°C) |
|--------------------|-------------------|------------------|-------------------|
| <b>PAI (s-s)</b>   | 348.3             | 262.5            | 101.3             |
| <b>PAI (s-su)</b>  | 357.3             | 257.9            | 93.1              |
| <b>PAI (su-s)</b>  | 362.3             | 262              | 98.1              |
| <b>PAI (s-u)</b>   | 365.8             | 266.4            | 92.4              |
| <b>PAI (u-s)</b>   | 377.8             | 265.6            | 97.7              |
| <b>PAI (su-su)</b> | 359.2             | 261.6            | 88.6              |
| <b>PAI (su-u)</b>  | 362.3             | 258.3            | 84.7              |
| <b>PAI (u-u)</b>   | 369.1             | -                | 89                |

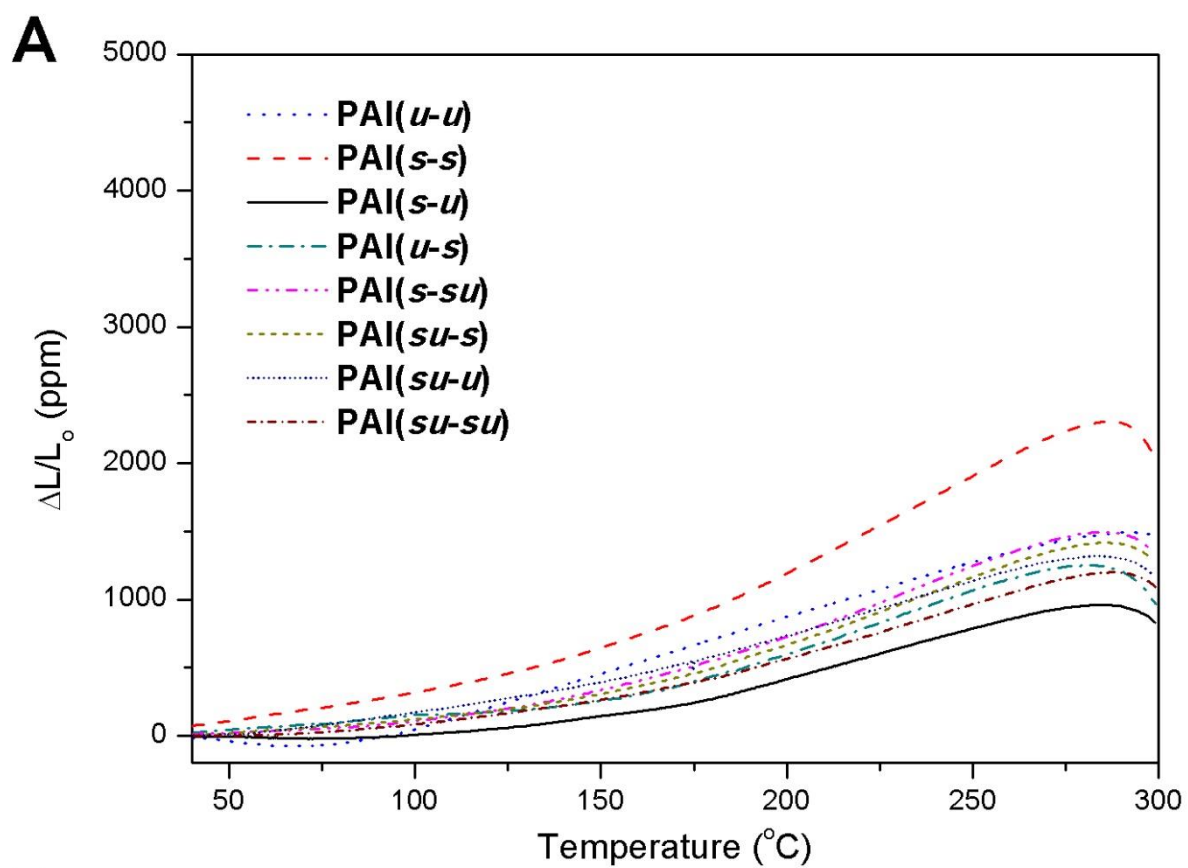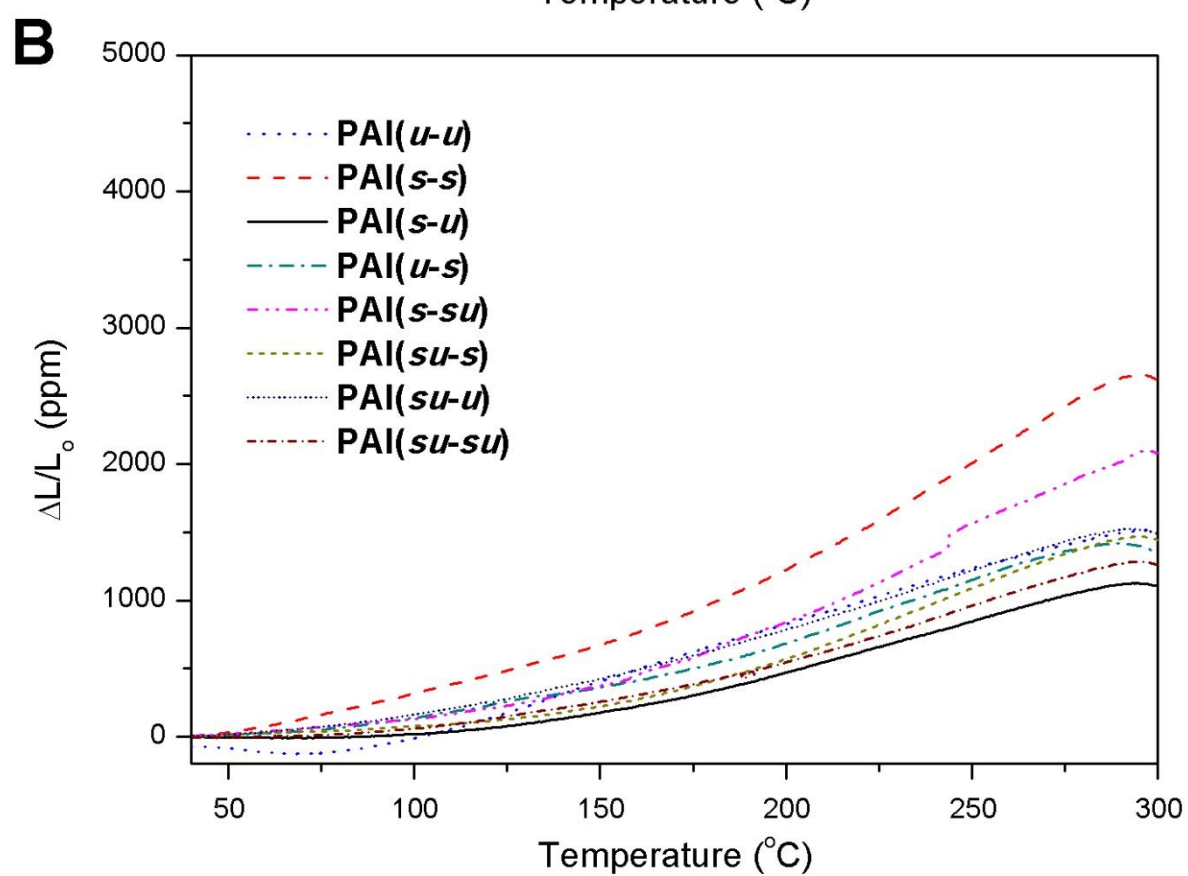

**Fig. S15.** TMA data of PAIs. (A) Second scans. (B) Third scans.

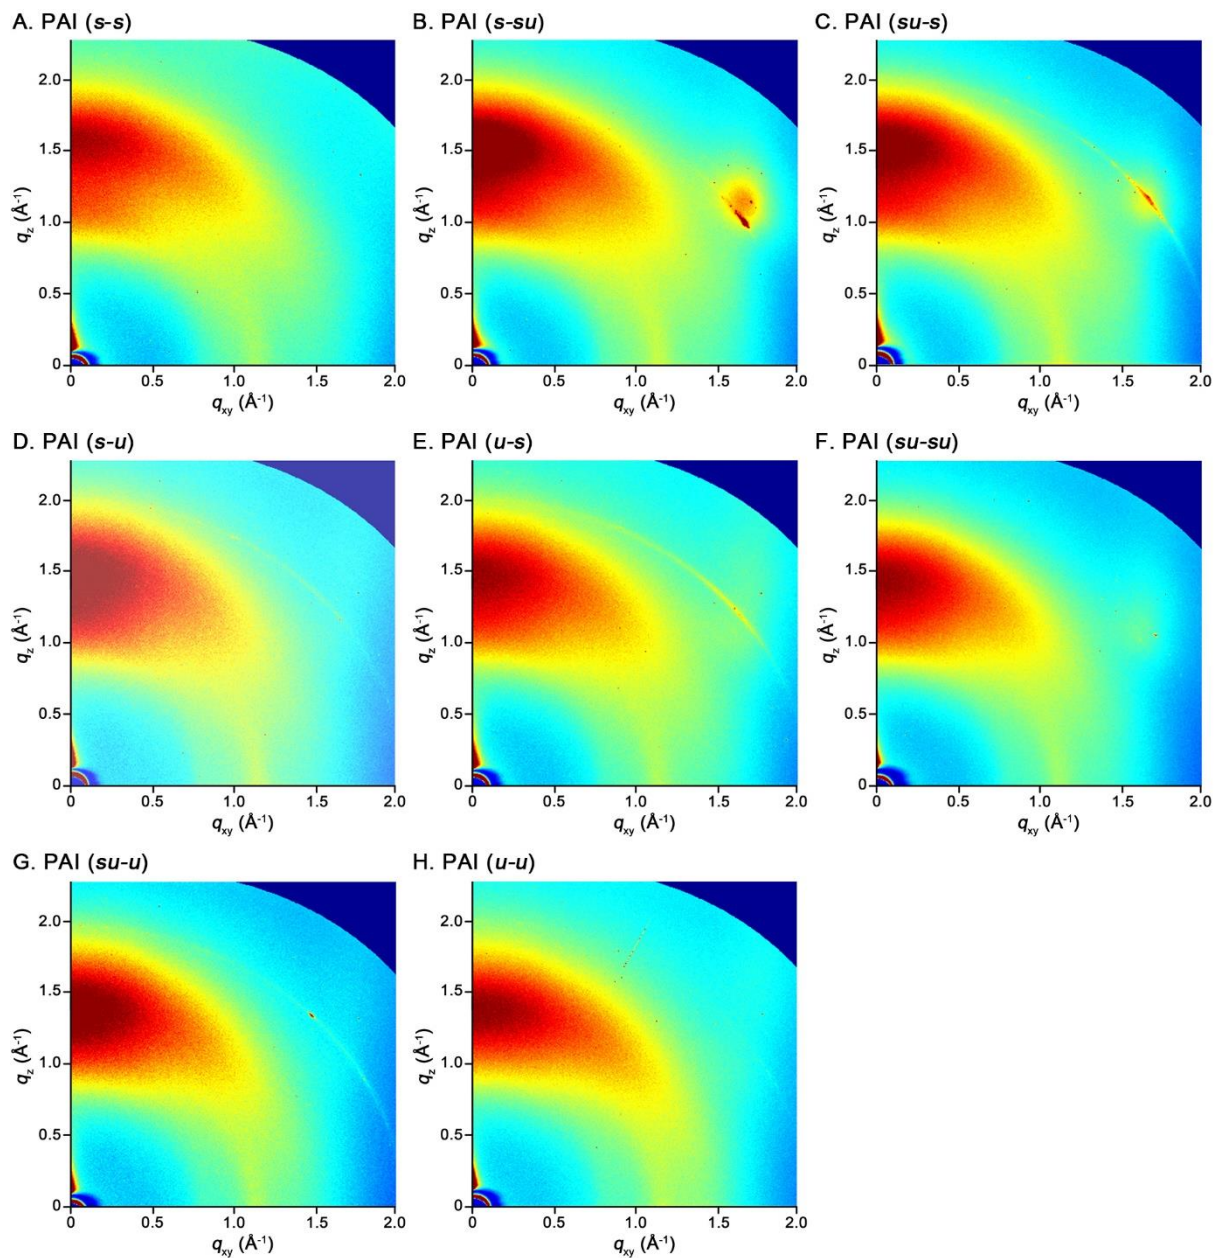

**Fig. S16. 2D GIWAXS data of PAIs.**

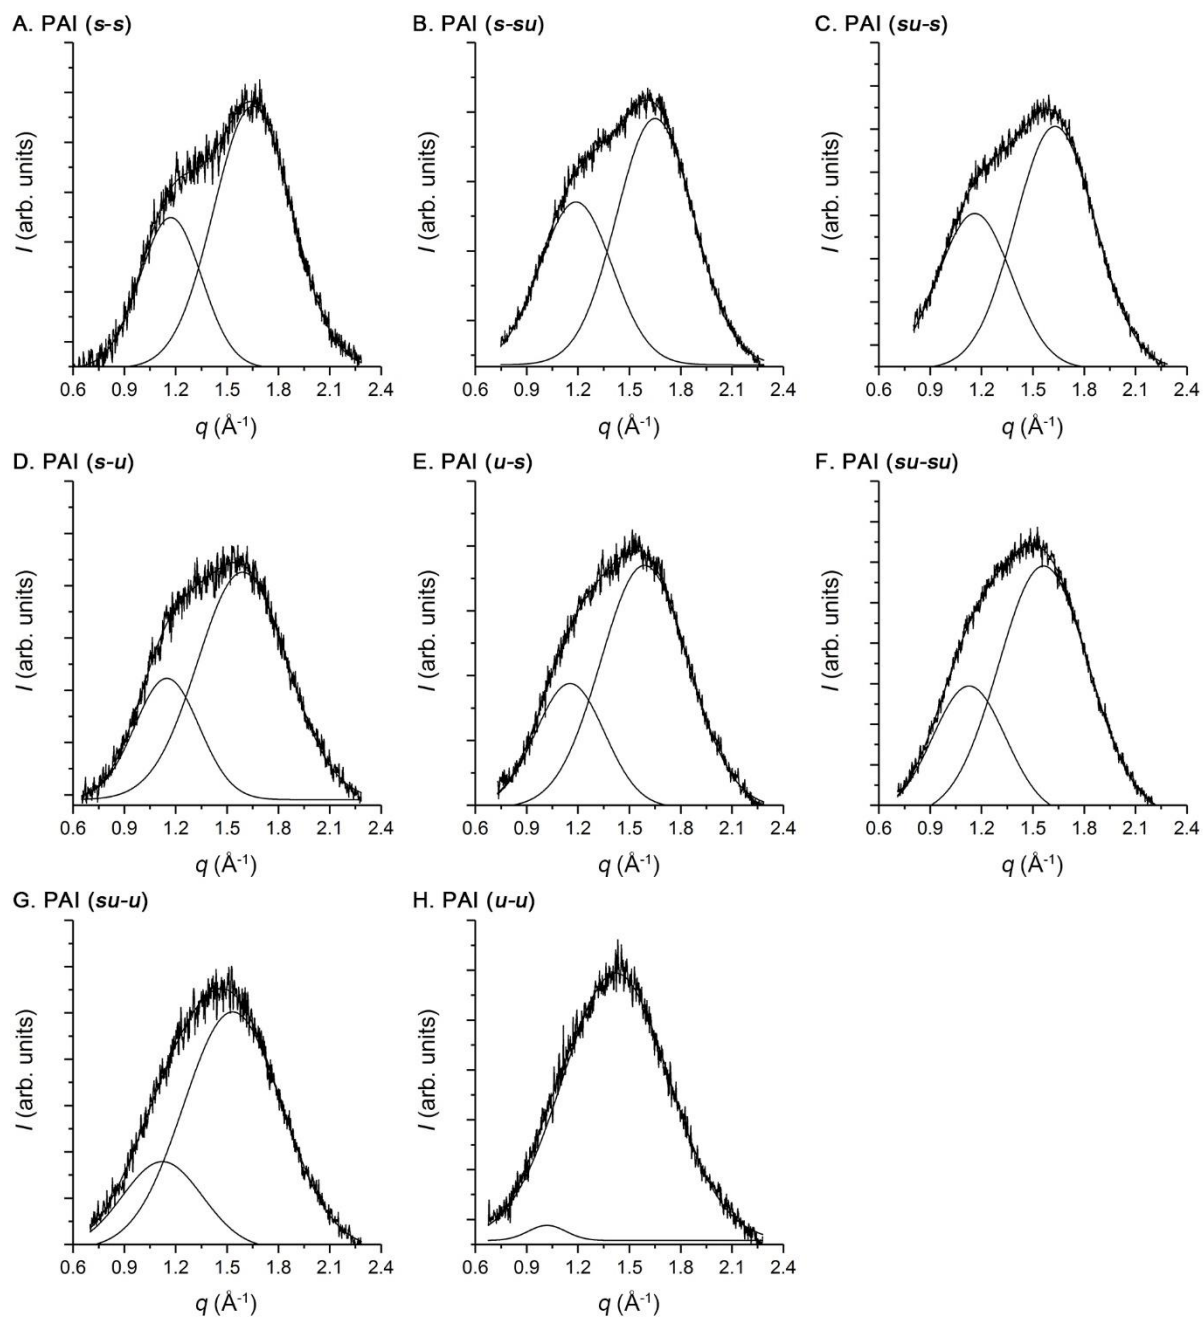

**Fig. S17. 1D deconvoluted plot of the GIWAXS data in out-of-plane direction.**

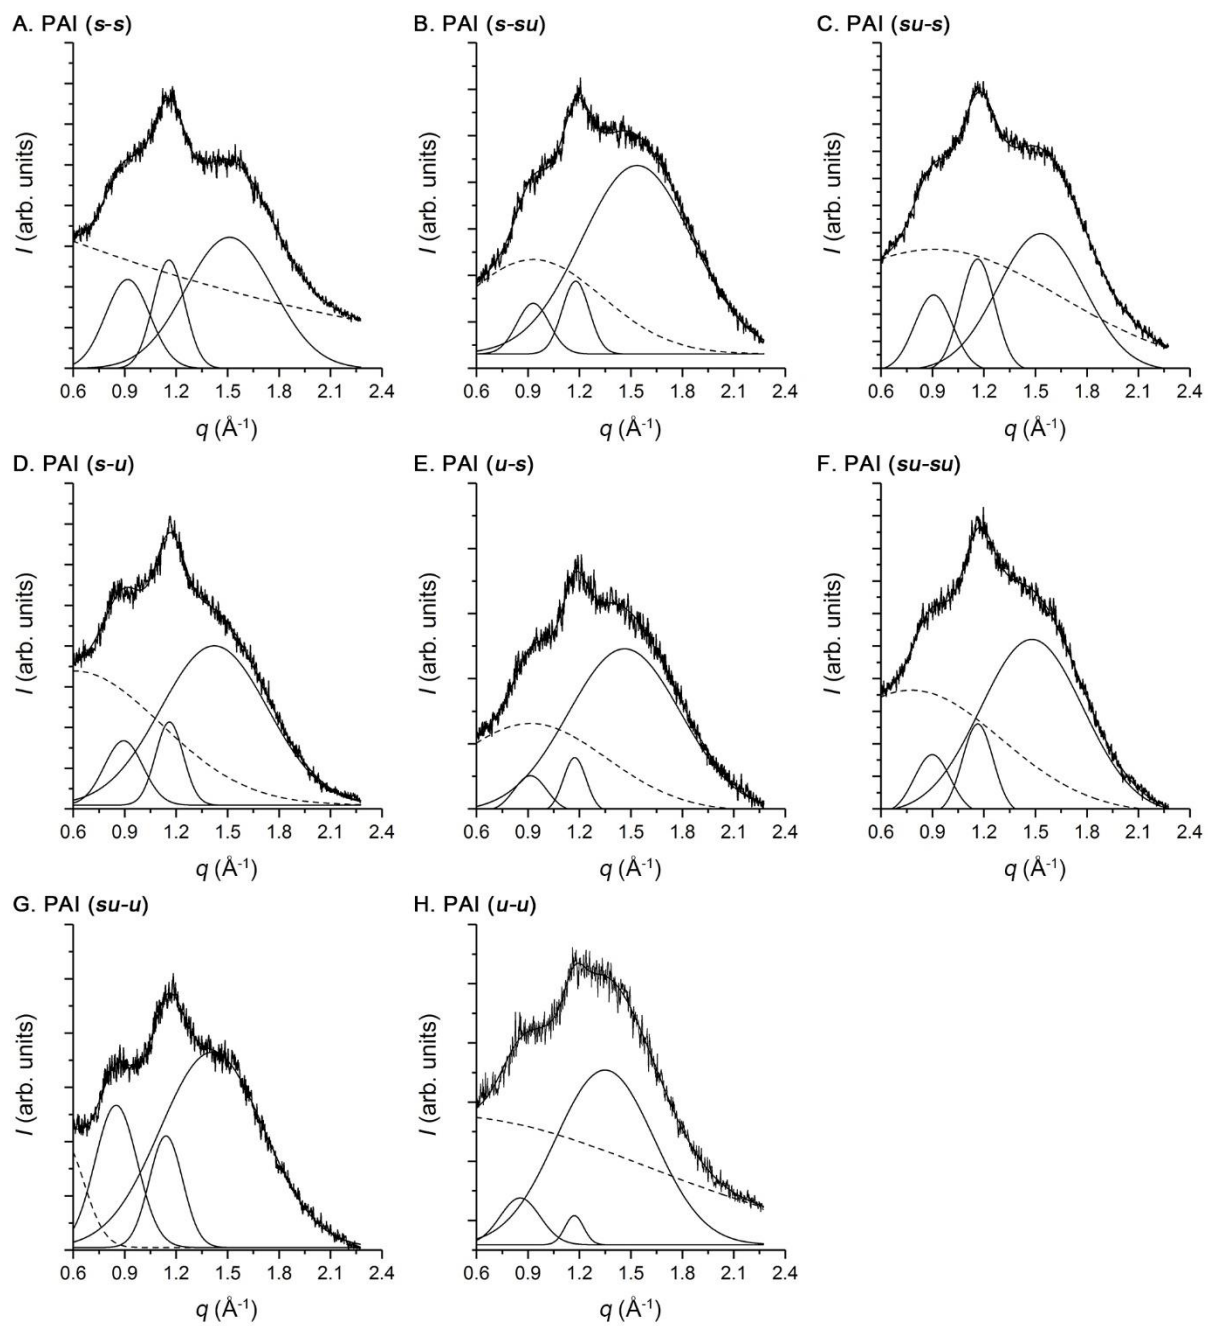

**Fig. S18. 1D deconvoluted plot of the GIWAXS data in in-plane direction.**

**Table S4. Summary of the GIWAXS peak positions.**

| In-plane                       | Peak position ( $\text{\AA}^{-1}$ ) | Characteristic distance ( $\text{\AA}$ ) | Assignment           | Out-of-plane                   | Peak position ( $\text{\AA}^{-1}$ ) | Characteristic distance ( $\text{\AA}$ ) | Assignment                       |
|--------------------------------|-------------------------------------|------------------------------------------|----------------------|--------------------------------|-------------------------------------|------------------------------------------|----------------------------------|
| <b>PAI</b><br>( <i>s-s</i> )   | 1.509                               | 4.164                                    |                      | <b>PAI</b><br>( <i>s-s</i> )   | 1.650                               | 3.808                                    | $\pi$ - $\pi$ stack <sup>b</sup> |
|                                | 1.158                               | 5.426                                    | ch-pack <sup>a</sup> |                                | 1.171                               | 5.366                                    | ch-pack                          |
|                                | 0.918                               | 6.844                                    |                      |                                |                                     |                                          |                                  |
| <b>PAI</b><br>( <i>s-su</i> )  | 1.536                               | 4.091                                    |                      | <b>PAI</b><br>( <i>s-su</i> )  | 1.650                               | 3.808                                    | $\pi$ - $\pi$ stack              |
|                                | 1.178                               | 5.334                                    | ch-pack              |                                | 1.188                               | 5.289                                    | ch-pack                          |
|                                | 0.930                               | 6.756                                    |                      |                                |                                     |                                          |                                  |
| <b>PAI</b><br>( <i>su-s</i> )  | 1.532                               | 4.101                                    |                      | <b>PAI</b><br>( <i>su-s</i> )  | 1.630                               | 3.855                                    | $\pi$ - $\pi$ stack              |
|                                | 1.163                               | 5.402                                    | ch-pack              |                                | 1.160                               | 5.416                                    | ch-pack                          |
|                                | 0.907                               | 6.927                                    |                      |                                |                                     |                                          |                                  |
| <b>PAI</b><br>( <i>s-u</i> )   | 1.422                               | 4.418                                    |                      | <b>PAI</b><br>( <i>s-u</i> )   | 1.591                               | 3.949                                    | $\pi$ - $\pi$ stack              |
|                                | 1.161                               | 5.412                                    | ch-pack              |                                | 1.148                               | 5.473                                    | ch-pack                          |
|                                | 0.894                               | 7.028                                    |                      |                                |                                     |                                          |                                  |
| <b>PAI</b><br>( <i>u-s</i> )   | 1.463                               | 4.295                                    |                      | <b>PAI</b><br>( <i>u-s</i> )   | 1.588                               | 3.957                                    | $\pi$ - $\pi$ stack              |
|                                | 1.173                               | 5.356                                    | ch-pack              |                                | 1.153                               | 5.449                                    | ch-pack                          |
|                                | 0.914                               | 6.874                                    |                      |                                |                                     |                                          |                                  |
| <b>PAI</b><br>( <i>su-su</i> ) | 1.480                               | 4.245                                    |                      | <b>PAI</b><br>( <i>su-su</i> ) | 1.562                               | 4.022                                    | $\pi$ - $\pi$ stack              |
|                                | 1.164                               | 5.398                                    | ch-pack              |                                | 1.127                               | 5.575                                    | ch-pack                          |
|                                | 0.899                               | 6.989                                    |                      |                                |                                     |                                          |                                  |
| <b>PAI</b><br>( <i>su-u</i> )  | 1.409                               | 4.459                                    |                      | <b>PAI</b><br>( <i>su-u</i> )  | 1.533                               | 4.099                                    | $\pi$ - $\pi$ stack              |
|                                | 1.141                               | 5.507                                    | ch-pack              |                                | 1.122                               | 5.600                                    | ch-pack                          |
|                                | 0.850                               | 7.392                                    |                      |                                |                                     |                                          |                                  |
| <b>PAI</b><br>( <i>u-u</i> )   | 1.349                               | 4.658                                    |                      | <b>PAI</b><br>( <i>u-u</i> )   | 1.422                               | 4.418                                    | $\pi$ - $\pi$ stack              |
|                                | 1.170                               | 5.370                                    | ch-pack              |                                | 1.019                               | 6.166                                    | ch-pack                          |
|                                | 0.854                               | 7.357                                    |                      |                                |                                     |                                          |                                  |

<sup>a</sup>ch-pack: the interchain packing distance of polymer chains. <sup>b</sup> $\pi$  - $\pi$  stack: face-to-face  $\pi$ -stacking distance of polymer chains.

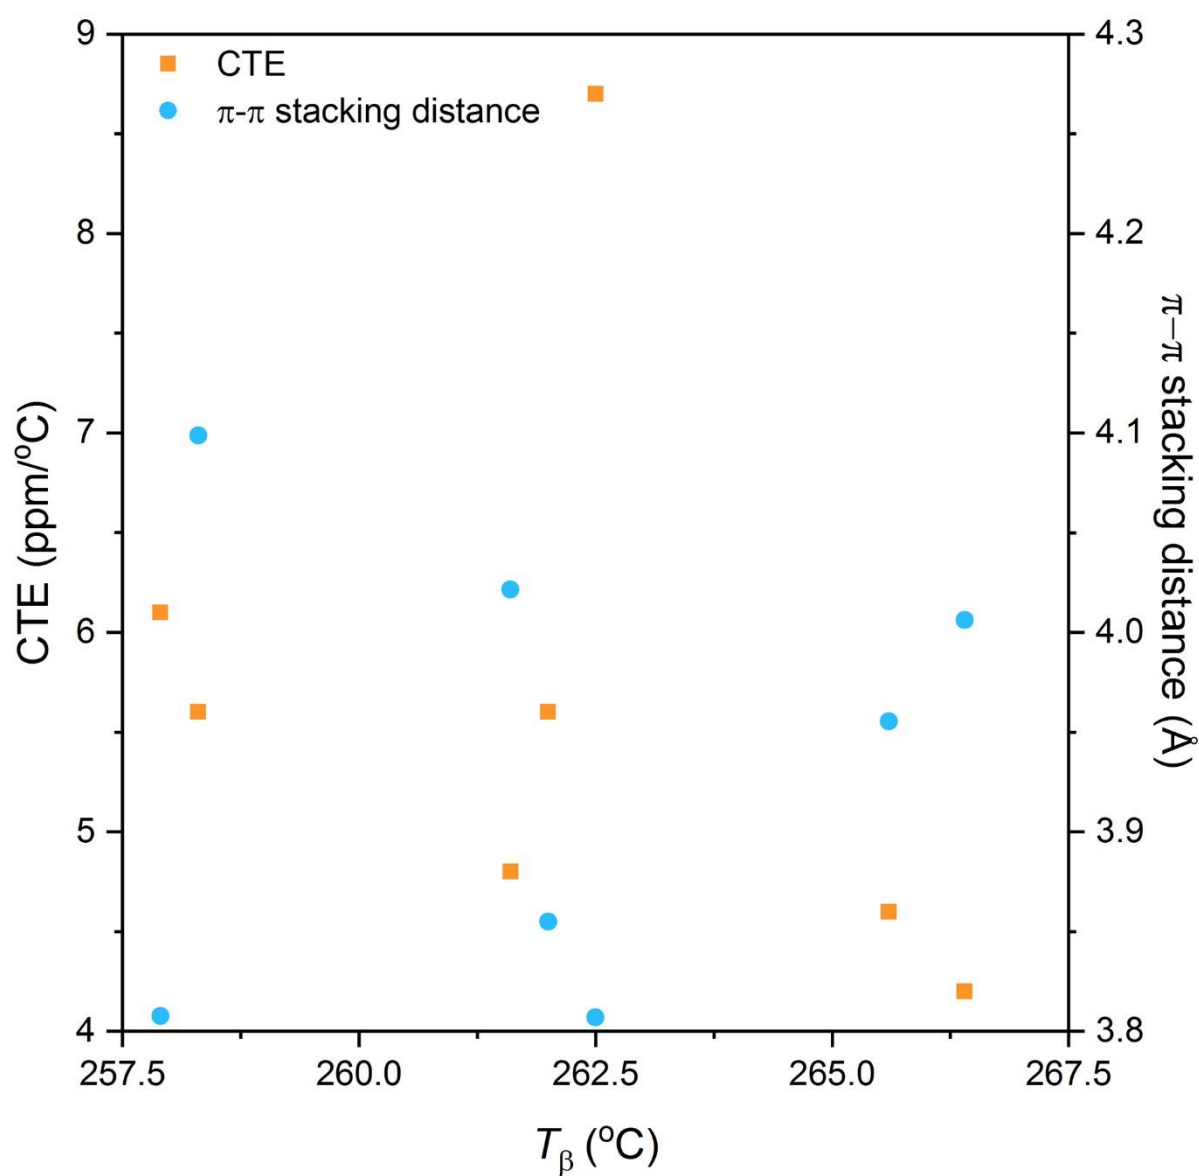

**Fig. S19.** A plot of CTE and  $\pi$ - $\pi$  stacking distance versus  $\beta$ -relaxation temperature determined by the DMA.



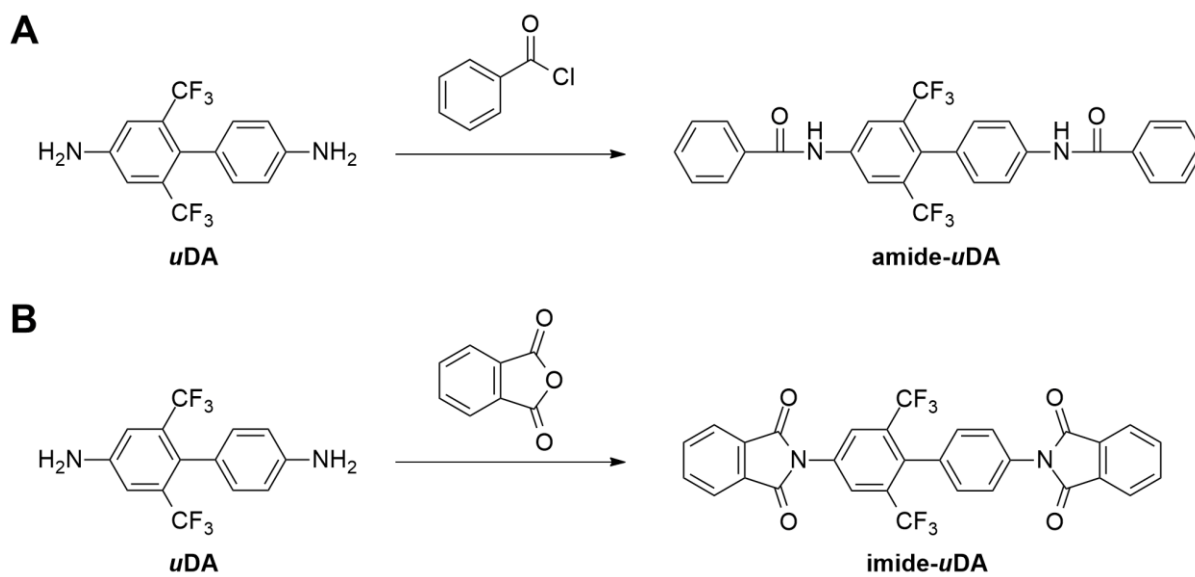

**Fig. S20. Synthetic route to model compound (A) amide-*u*DA and (B) imide-*u*DA.**

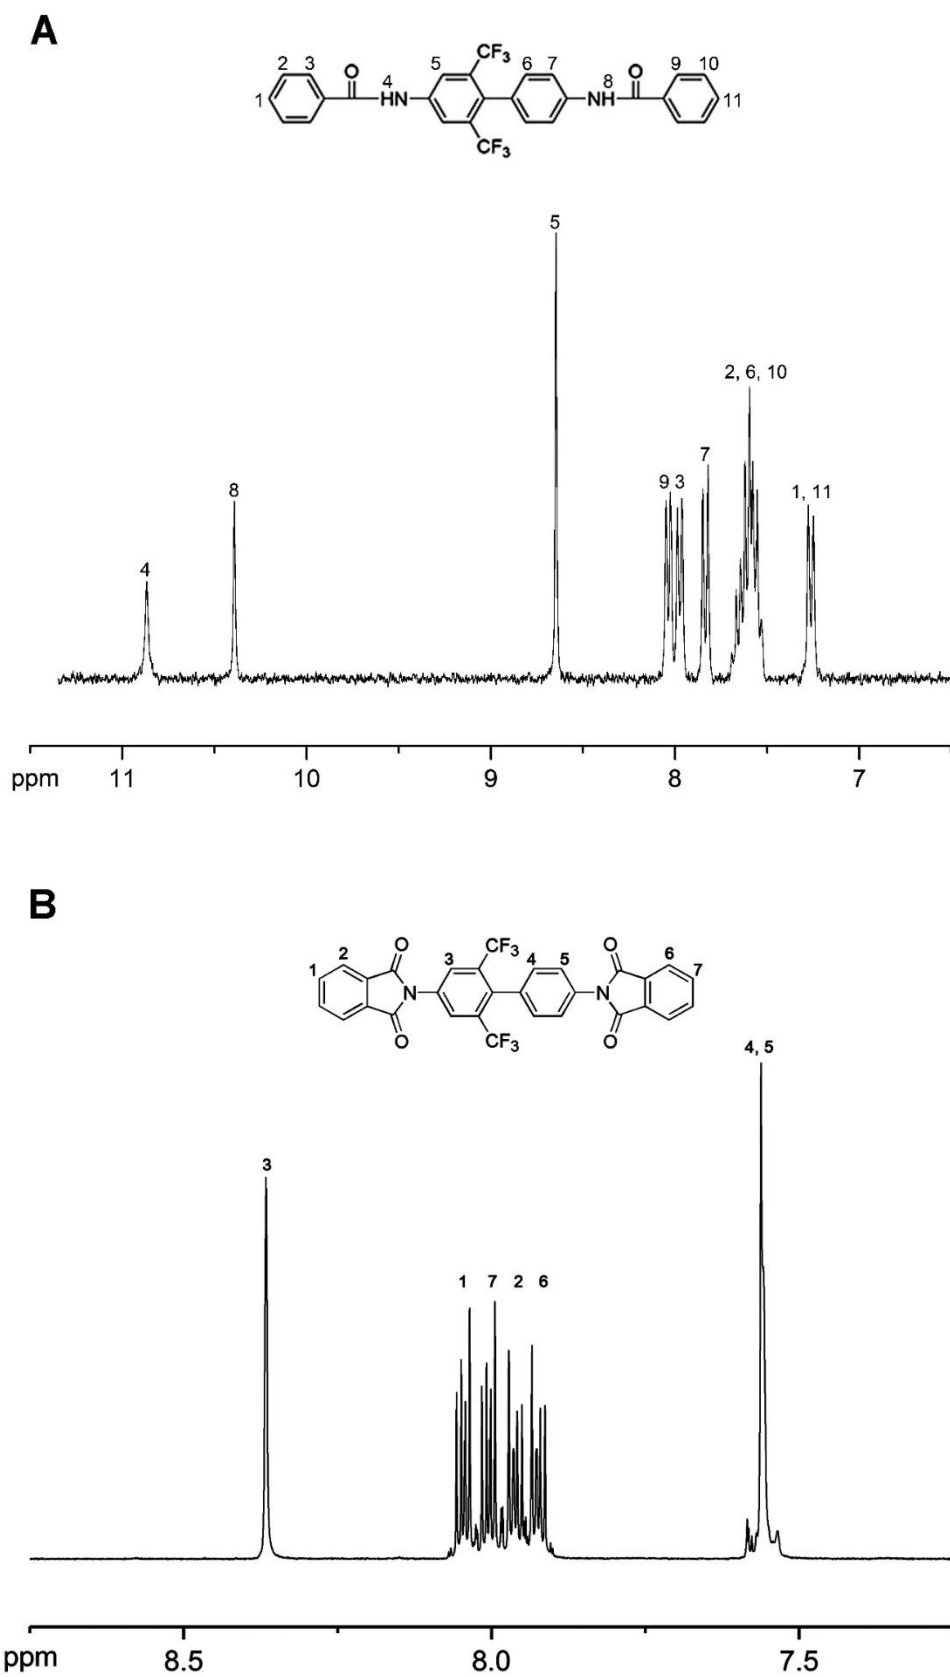

**Fig. S21.**  $^1\text{H}$  NMR spectra of model compound (A) amide-*u*DA and (B) imide-*u*DA.

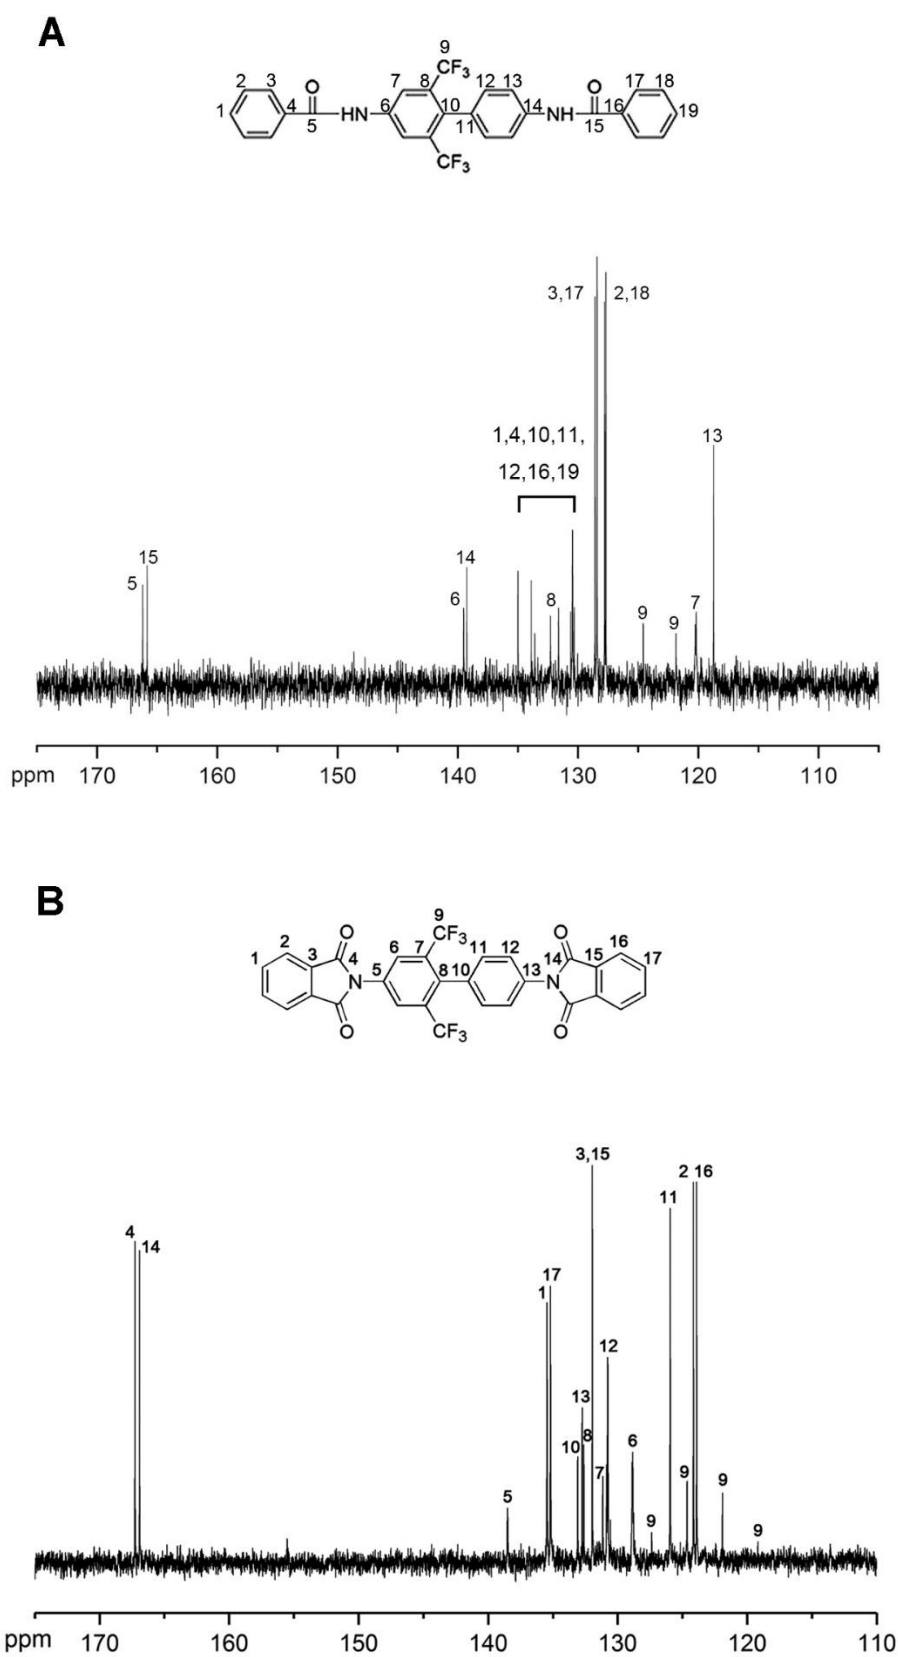

**Fig. S22.**  $^{13}\text{C}$  NMR spectra of model compound (A) amide-*u*DA and (B) imide-*u*DA.

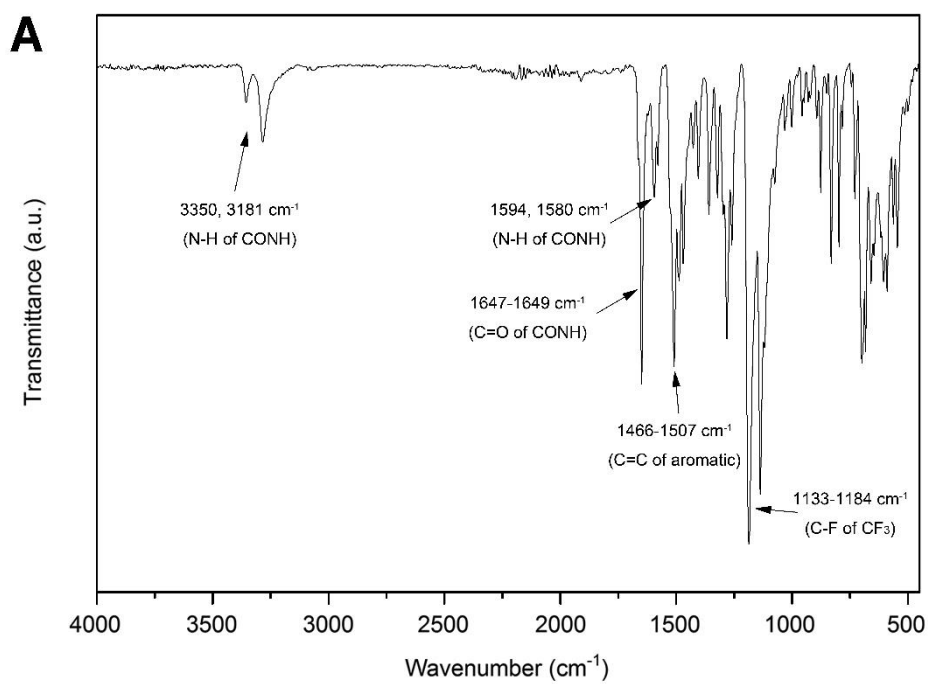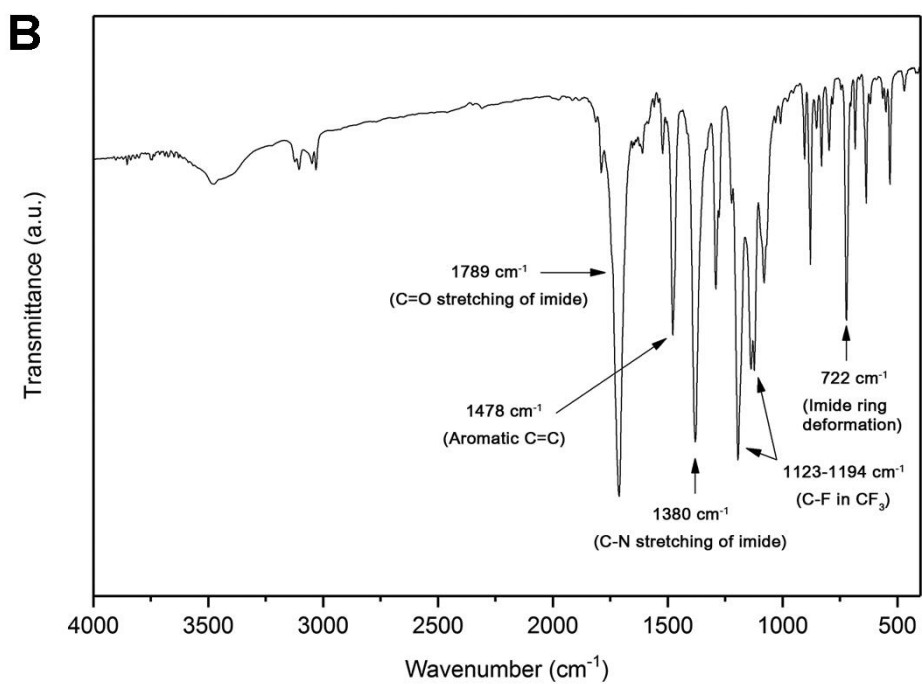

**Fig. S23. FTIR spectra of model compound (A) amide-*u*DA and (B) imide-*u*DA.**

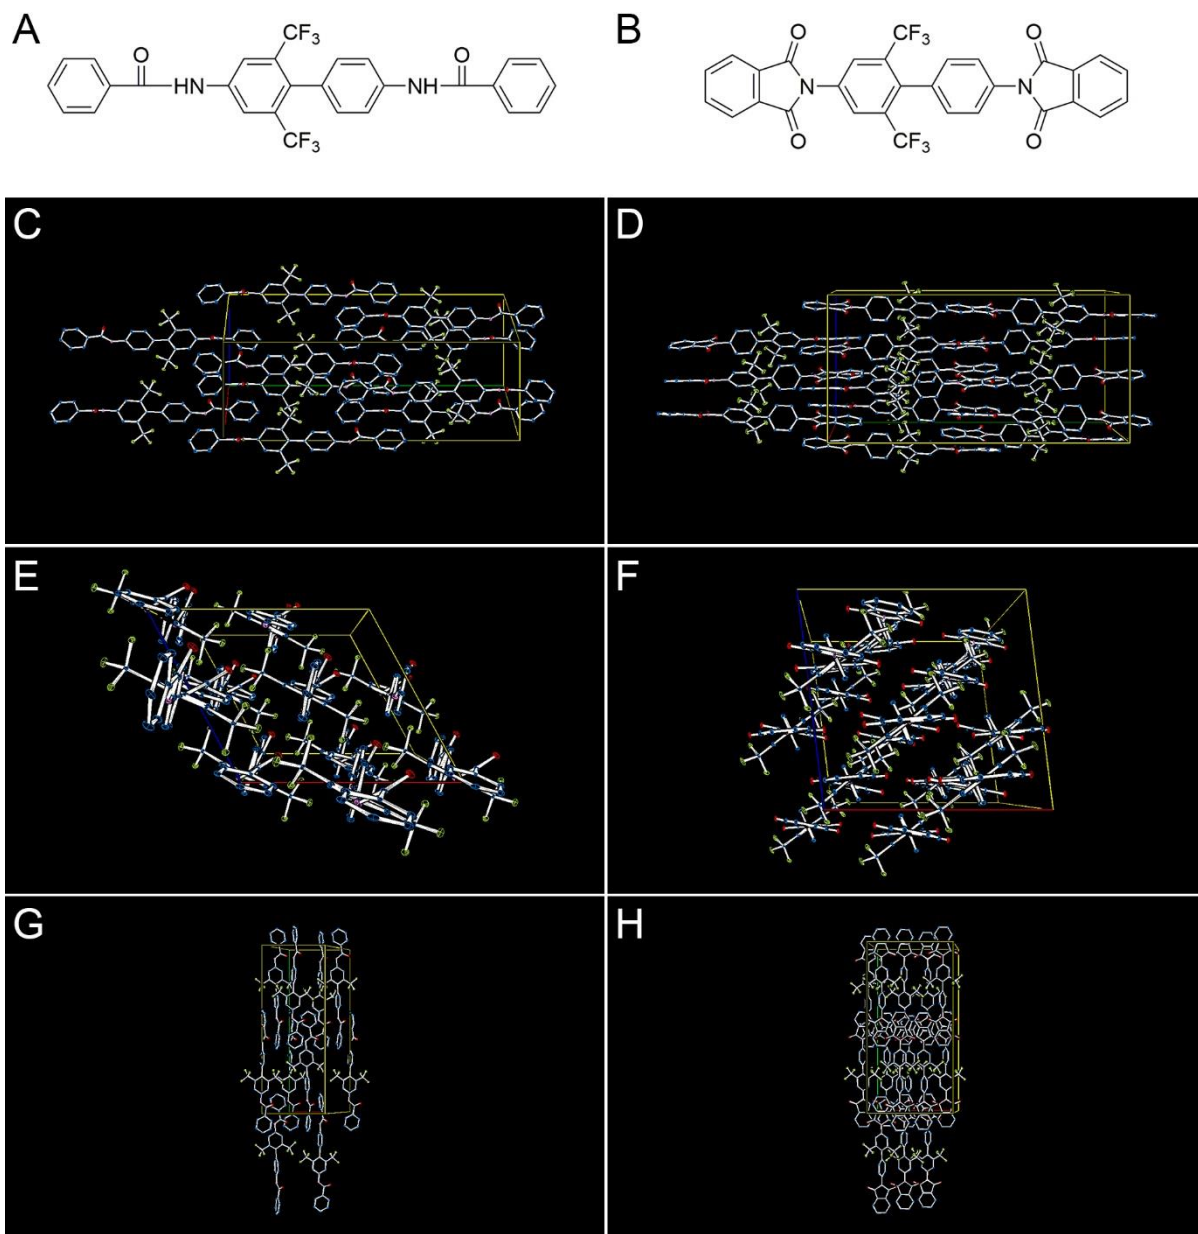

**Fig. S24. (A, B) Chemical structure of amide-*u*DA (A) and imide-*u*DA (B) model compounds. (C, E, G) Crystal structure of amide-*u*DA in (100), (010), and (001) directions. (D, F, H) Crystal structure of imide-*u*DA in (100), (010), and (001) directions. Full crystallographic details can be obtained free of charge from the Cambridge Crystallographic Data Center via [www.ccdc.cam.ac.uk/data\\_request/cif](http://www.ccdc.cam.ac.uk/data_request/cif) (CCDC 1587696 and 1587708).**

**Tables S5. Crystal data and structure refinement for amide-*u*DA.**

|                                   |                                                                              |
|-----------------------------------|------------------------------------------------------------------------------|
| Empirical formula                 | C <sub>28</sub> H <sub>16</sub> F <sub>6</sub> N <sub>2</sub> O <sub>2</sub> |
| Formula weight                    | 528.44                                                                       |
| Temperature                       | 120(2) K                                                                     |
| Wavelength                        | 0.71073 Å                                                                    |
| Crystal system                    | Monoclinic                                                                   |
| Space group                       | C c                                                                          |
| Unit cell dimensions              | a = 10.3506(18) Å                                                            |
| b = 27.652(5) Å                   |                                                                              |
| c = 9.1626(16) Å                  |                                                                              |
| Volume                            | 2300.7(7) Å <sup>3</sup>                                                     |
| Z                                 | 4                                                                            |
| Density (calculated)              | 1.526 Mg/m <sup>3</sup>                                                      |
| Absorption coefficient            | 0.130 mm <sup>-1</sup>                                                       |
| F(000)                            | 1080.0                                                                       |
| Crystal size                      | 0.380 x 0.140 x 0.120 mm <sup>3</sup>                                        |
| Theta range for data collection   | 2.361 to 26.472°.                                                            |
| Index ranges                      | -12 ≤ h ≤ 12, -34 ≤ k ≤ 34, -11 ≤ l ≤ 11                                     |
| Reflections collected             | 30188                                                                        |
| Independent reflections           | 4724 [R(int) = 0.1092]                                                       |
| Completeness to theta = 25.242°   | 100.0 %                                                                      |
| Refinement method                 | Full-matrix least-squares on F <sup>2</sup>                                  |
| Data / restraints / parameters    | 4724 / 2 / 343                                                               |
| Goodness-of-fit on F <sup>2</sup> | 1.034                                                                        |
| Final R indices [I > 2σ(I)]       | R1 = 0.0920, wR2 = 0.2179                                                    |
| R indices (all data)              | R1 = 0.1361, wR2 = 0.2519                                                    |
| Extinction coefficient            | n/a                                                                          |
| Largest diff. peak and hole       | 0.589 and -0.525 e.Å <sup>-3</sup>                                           |

**Tables S6. Crystal data and structure refinement for imide-*u*DA.**

|                                   |                                                                              |
|-----------------------------------|------------------------------------------------------------------------------|
| Empirical formula                 | C <sub>30</sub> H <sub>14</sub> F <sub>6</sub> N <sub>2</sub> O <sub>4</sub> |
| Formula weight                    | 580.43                                                                       |
| Temperature                       | 120(2) K                                                                     |
| Wavelength                        | 0.71073 Å                                                                    |
| Crystal system                    | Monoclinic                                                                   |
| Space group                       | C 2/c                                                                        |
| Unit cell dimensions              | a = 13.8533(10) Å<br>b = 27.477(2) Å<br>c = 13.4481(10) Å                    |
| Volume                            | 5082.3(7) Å <sup>3</sup>                                                     |
| Z                                 | 8                                                                            |
| Density (calculated)              | 1.517 Mg/m <sup>3</sup>                                                      |
| Absorption coefficient            | 0.131 mm <sup>-1</sup>                                                       |
| F(000)                            | 2352                                                                         |
| Crystal size                      | 0.200 x 0.100 x 0.050 mm <sup>3</sup>                                        |
| Theta range for data collection   | 1.656 to 27.760°.                                                            |
| Index ranges                      | -17<=h<=18, -35<=k<=35, -16<=l<=17                                           |
| Reflections collected             | 46515                                                                        |
| Independent reflections           | 5824 [R(int) = 0.1092]                                                       |
| Completeness to theta = 25.242°   | 99.9 %                                                                       |
| Refinement method                 | Full-matrix least-squares on F <sup>2</sup>                                  |
| Data / restraints / parameters    | 5824 / 0 / 379                                                               |
| Goodness-of-fit on F <sup>2</sup> | 1.027                                                                        |
| Final R indices [I>2sigma(I)]     | R1 = 0.0921, wR2 = 0.2408                                                    |
| R indices (all data)              | R1 = 0.1674, wR2 = 0.3036                                                    |
| Extinction coefficient            | n/a                                                                          |
| Largest diff. peak and hole       | 1.152 and -0.443 e.Å <sup>-3</sup>                                           |

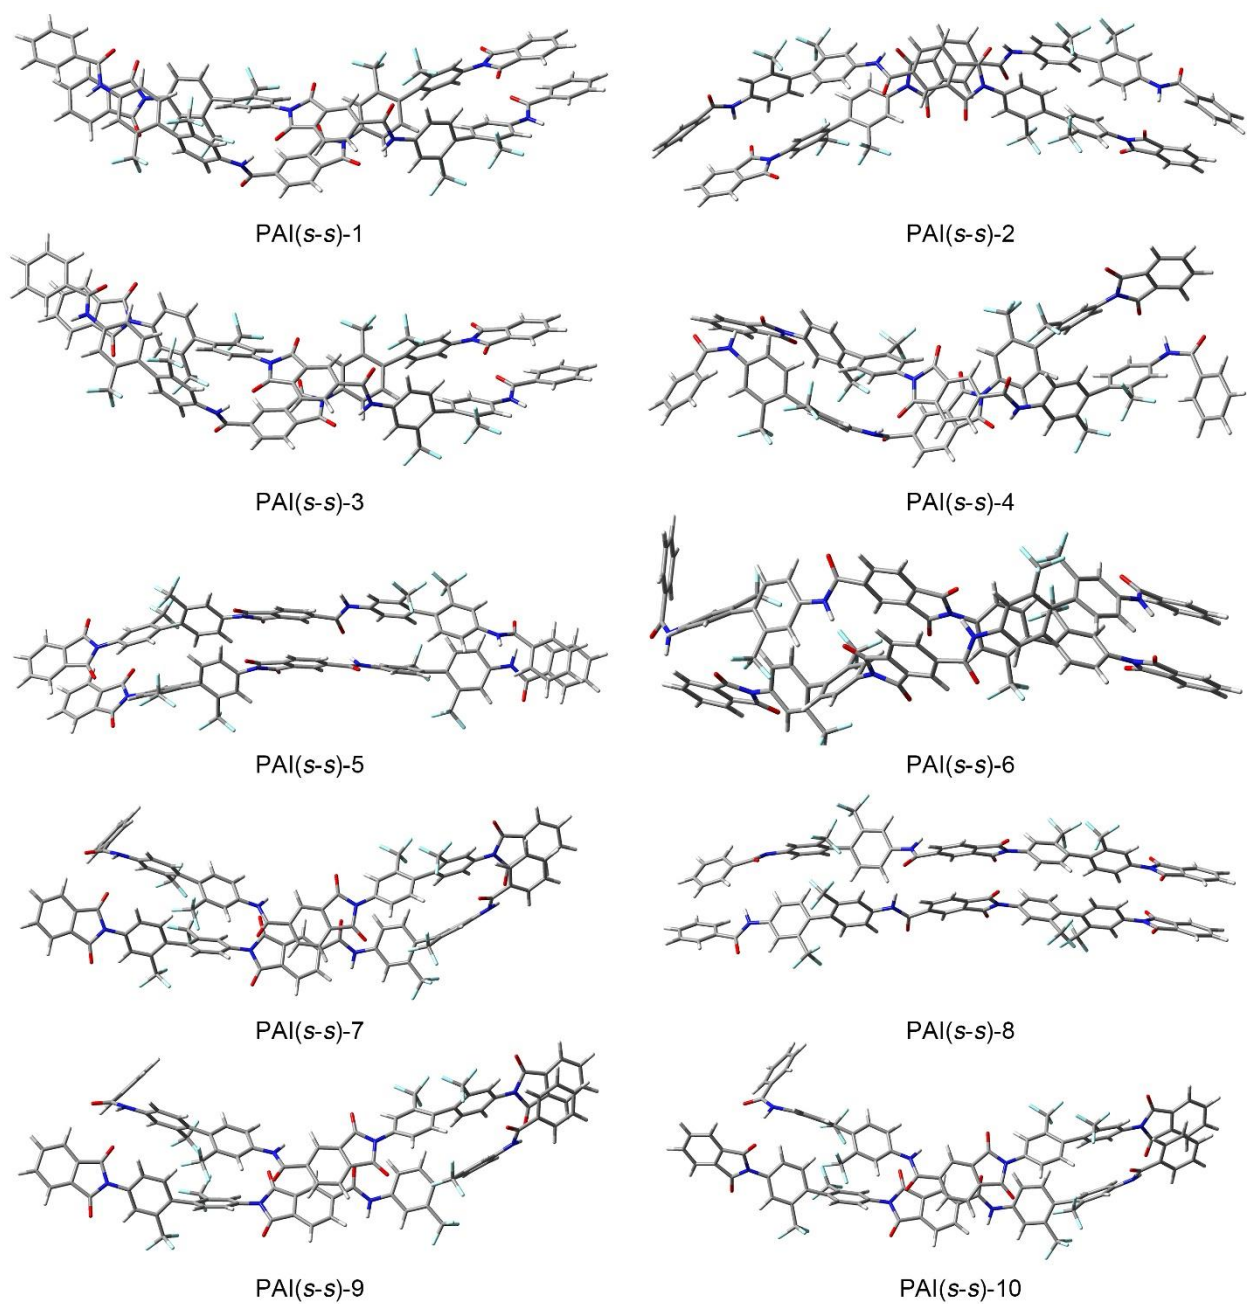

**Fig. S25. Ten most stable structures of PAI(s-s).**



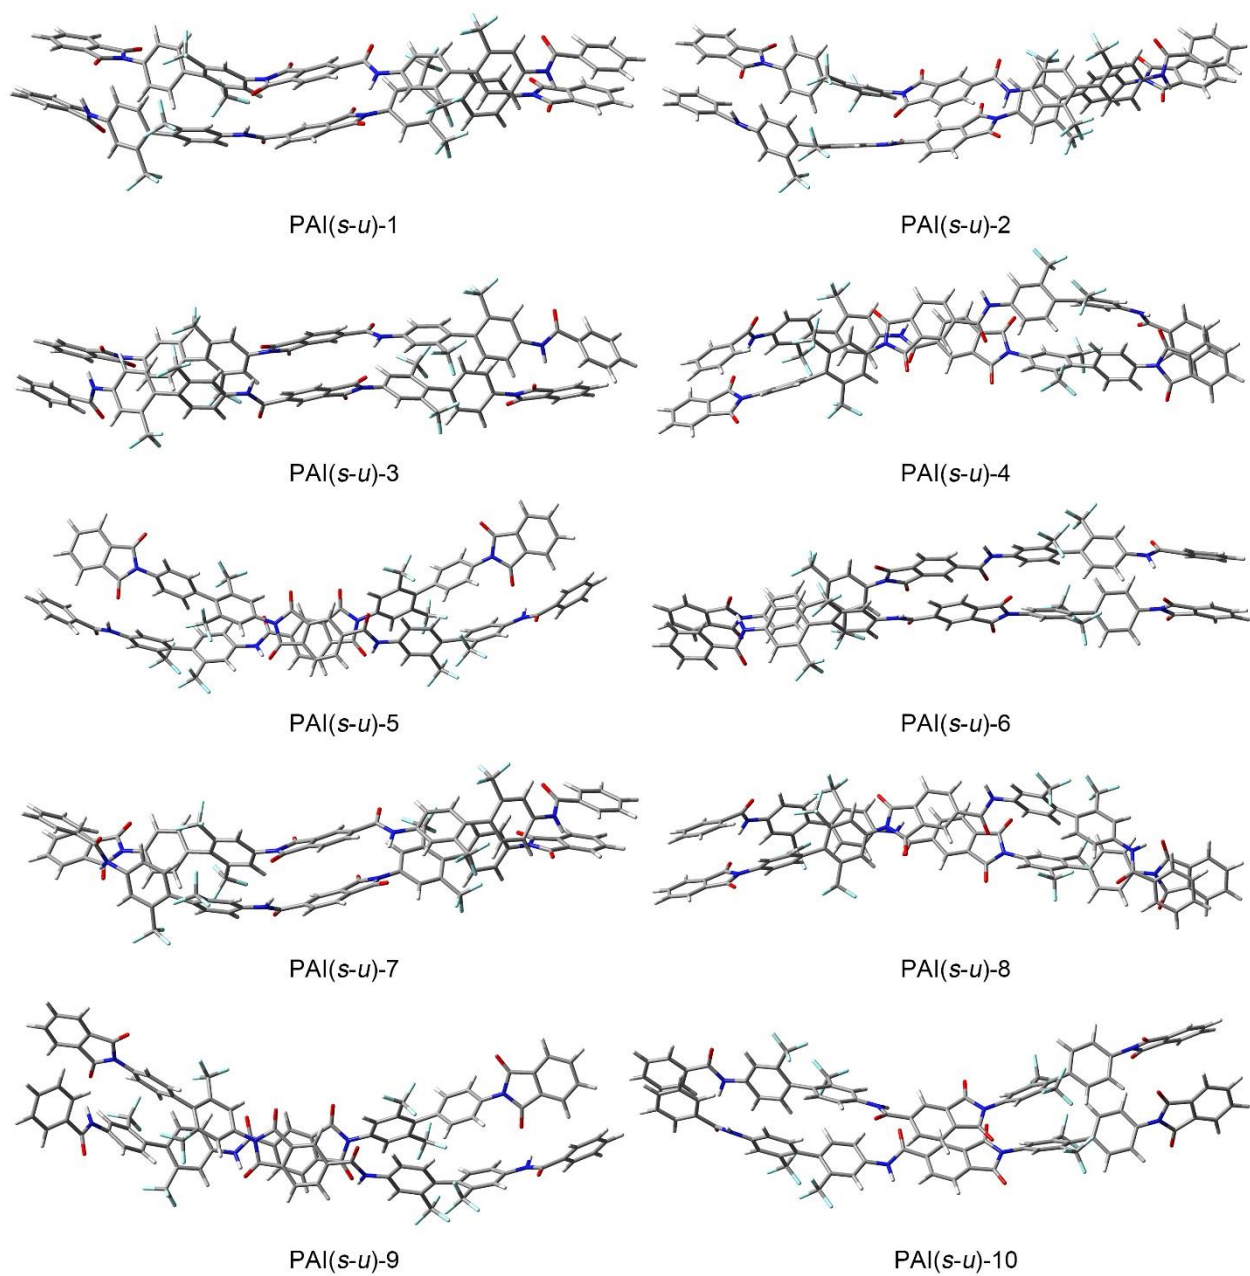

**Fig. S26. Ten most stable structures of PAI(s-u).**

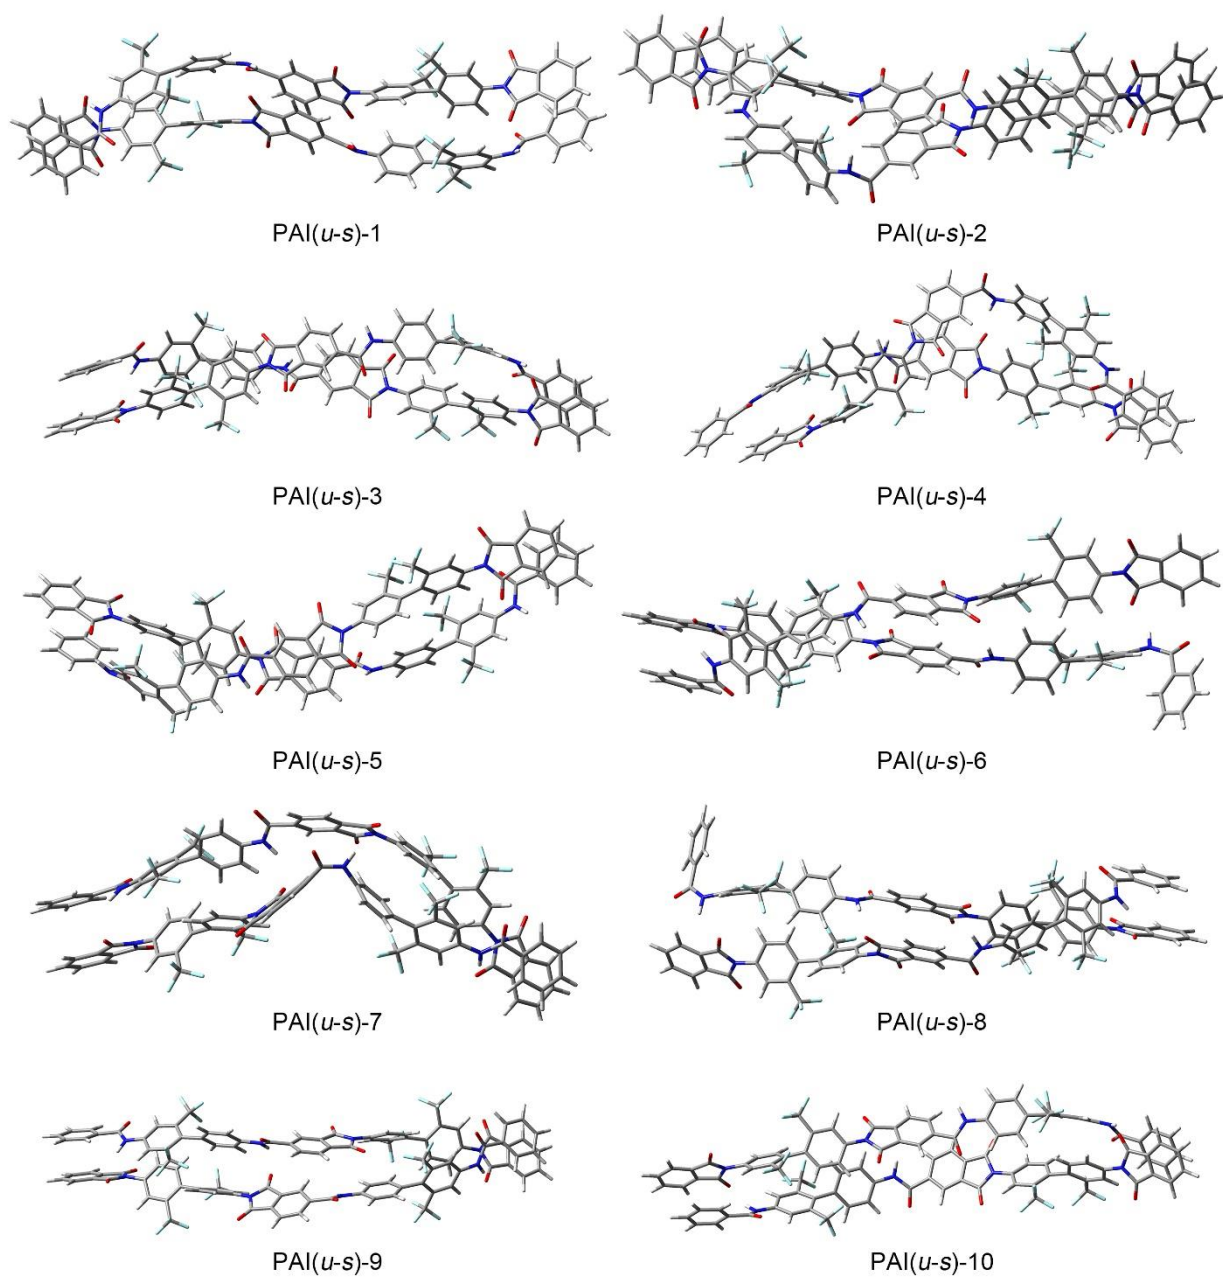

**Fig. S27. Ten most stable structures of PAI(*u-s*).**

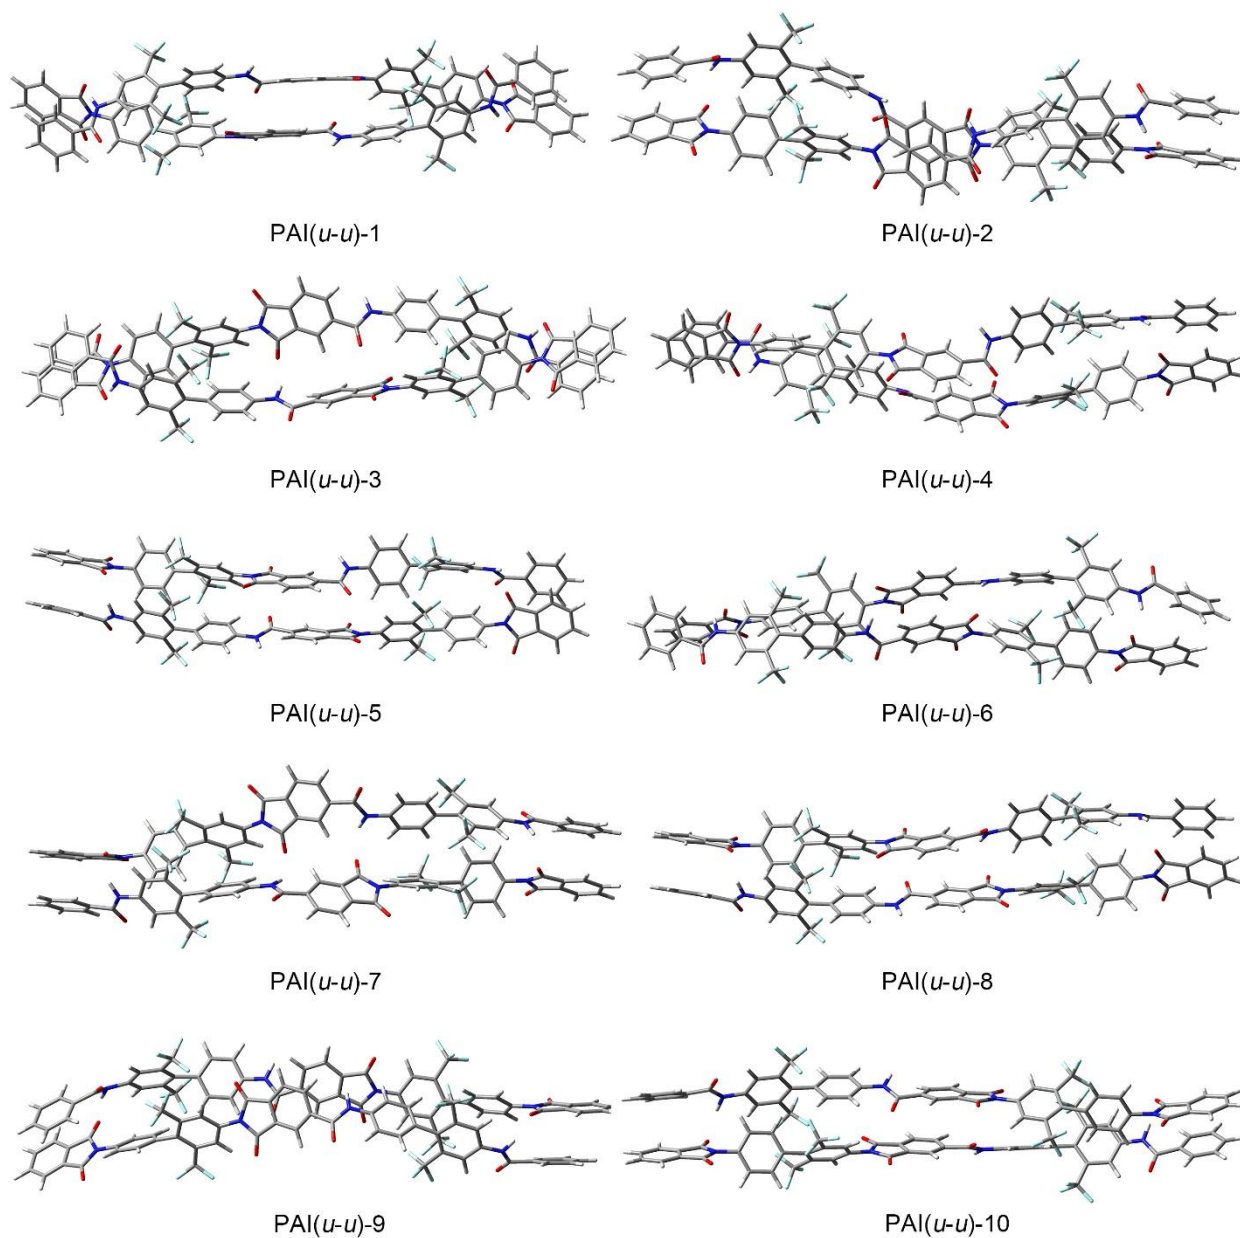

**Fig. S28. Ten most stable structures of PAI(*u-u*).**

**Table S7. Bonding energies and geometric features of the 10 most stable dimeric structures for each of PAI(*s-s*), PAI(*s-u*), PAI(*u-s*), and PAI(*u-u*).**

| Name                 | Bonding Energy (kcal/mol) | Parallel(P)/Anti-parallel(A) | Inter-twined? | Name                 | Bonding Energy (kcal/mol) | Parallel(P)/Anti-parallel(A) | Inter-twined? |
|----------------------|---------------------------|------------------------------|---------------|----------------------|---------------------------|------------------------------|---------------|
| PAI( <i>s-s</i> )-1  | -67.8                     | A                            | Yes           | PAI( <i>u-s</i> )-1  | -68.1                     | A                            | Yes           |
| PAI( <i>s-s</i> )-2  | -66.3                     | A                            | Yes           | PAI( <i>u-s</i> )-2  | -65.4                     | A                            | No            |
| PAI( <i>s-s</i> )-3  | -66.2                     | A                            | Yes           | PAI( <i>u-s</i> )-3  | -65.5                     | A                            | Yes           |
| PAI( <i>s-s</i> )-4  | -62.6                     | A                            | Yes           | PAI( <i>u-s</i> )-4  | -63.3                     | A                            | Yes           |
| PAI( <i>s-s</i> )-5  | -62.5                     | P                            | No            | PAI( <i>u-s</i> )-5  | -62.2                     | A                            | Yes           |
| PAI( <i>s-s</i> )-6  | -59.7                     | A                            | Yes           | PAI( <i>u-s</i> )-6  | -61.4                     | A                            | Yes           |
| PAI( <i>s-s</i> )-7  | -54.6                     | A                            | No            | PAI( <i>u-s</i> )-7  | -61.4                     | A                            | No            |
| PAI( <i>s-s</i> )-8  | -53.5                     | P                            | No            | PAI( <i>u-s</i> )-8  | -61.0                     | A                            | Yes           |
| PAI( <i>s-s</i> )-9  | -52.9                     | A                            | No            | PAI( <i>u-s</i> )-9  | -60.9                     | A                            | No            |
| PAI( <i>s-s</i> )-10 | -52.4                     | A                            | No            | PAI( <i>u-s</i> )-10 | -60.5                     | A                            | No            |
| PAI( <i>s-u</i> )-1  | -65.2                     | A                            | No            | PAI( <i>u-u</i> )-1  | -61.6                     | A                            | Yes           |
| PAI( <i>s-u</i> )-2  | -65.1                     | A                            | No            | PAI( <i>u-u</i> )-2  | -60.1                     | A                            | No            |
| PAI( <i>s-u</i> )-3  | -63.4                     | A                            | No            | PAI( <i>u-u</i> )-3  | -59.1                     | A                            | Yes           |
| PAI( <i>s-u</i> )-4  | -64.9                     | A                            | Yes           | PAI( <i>u-u</i> )-4  | -59.0                     | A                            | No            |
| PAI( <i>s-u</i> )-5  | -61.8                     | A                            | Yes           | PAI( <i>u-u</i> )-5  | -58.6                     | A                            | No            |
| PAI( <i>s-u</i> )-6  | -62.8                     | A                            | No            | PAI( <i>u-u</i> )-6  | -55.8                     | A                            | No            |
| PAI( <i>s-u</i> )-7  | -61.5                     | A                            | Yes           | PAI( <i>u-u</i> )-7  | -56.0                     | A                            | Yes           |
| PAI( <i>s-u</i> )-8  | -62.0                     | A                            | Yes           | PAI( <i>u-u</i> )-8  | -56.6                     | A                            | No            |
| PAI( <i>s-u</i> )-9  | -59.8                     | A                            | Yes           | PAI( <i>u-u</i> )-9  | -56.3                     | A                            | No            |
| PAI( <i>s-u</i> )-10 | -60.1                     | P                            | No            | PAI( <i>u-u</i> )-10 | -56.0                     | A                            | No            |

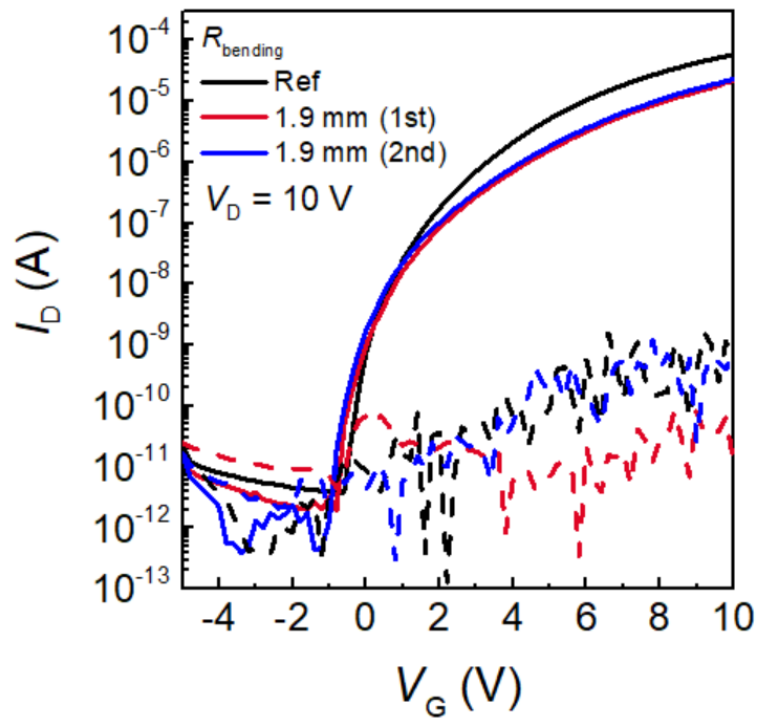

**Fig. S29. Transfer characteristics of the IGZO TFTs under study.** Black curve refers to the characteristics measured before bending; red one refers to the characteristics measured flat after being bent 10 times at a bending radius of 1.9mm; blue one indicates the characteristics measured flat one hour after the first run of the bending experiment.
